# Supplementary material for: The synthesis of new oxazoline-containing bifunctional catalysts and their application in the addition of diethylzinc to aldehydes
Source: Royal Society of Chemistry journal article supplement (doi:10.1039/b822580j), 2009-01-01

*Supporting information*

**The Synthesis of New Oxazoline-Containing Bifunctional Catalysts and their Application in the Addition of Diethylzinc to Aldehydes**

Vincent Coeffard, Helge Müller-Bunz and Patrick J. Guiry\*

*Centre for Synthesis and Chemical Biology, Conway Institute of Biomolecular Research, School of Chemistry and Chemical Biology, University College Dublin, Belfield, Dublin 4, Ireland. E-mail: patrick.guiry@ucd.ie; Fax: +353-1-7162501*

**Table of contents**

<sup>1</sup>H and <sup>13</sup>C NMR spectra for compounds **4d**, **5a-5e**, **6-16** and **ZnCl<sub>2</sub>·5e** S2-S19

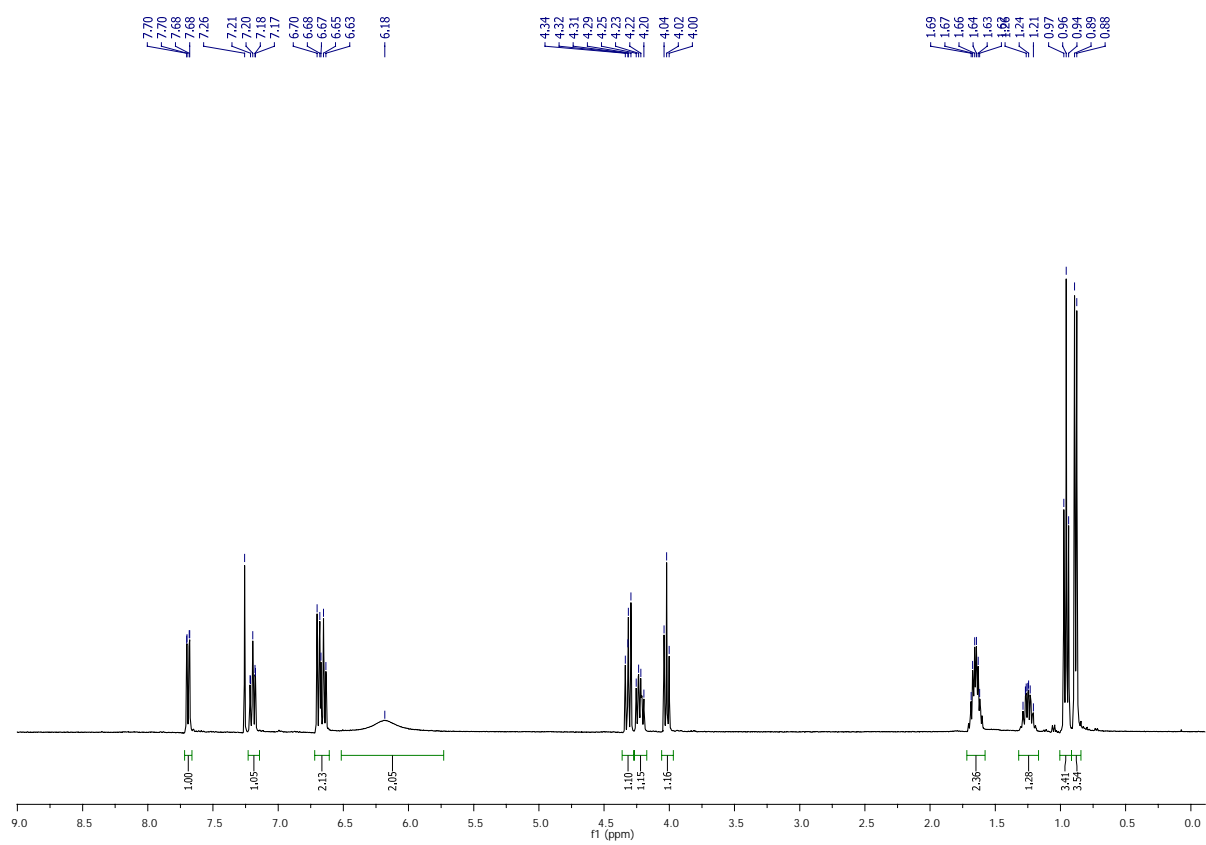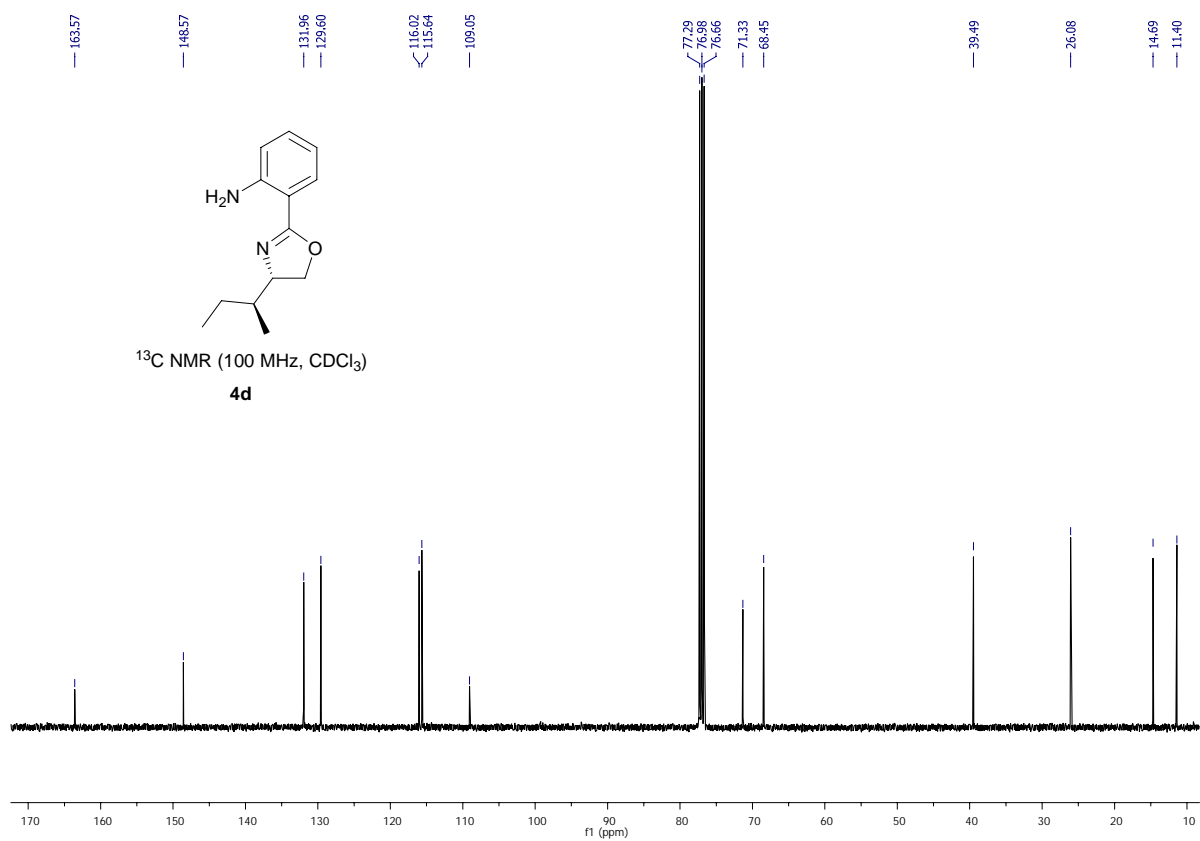



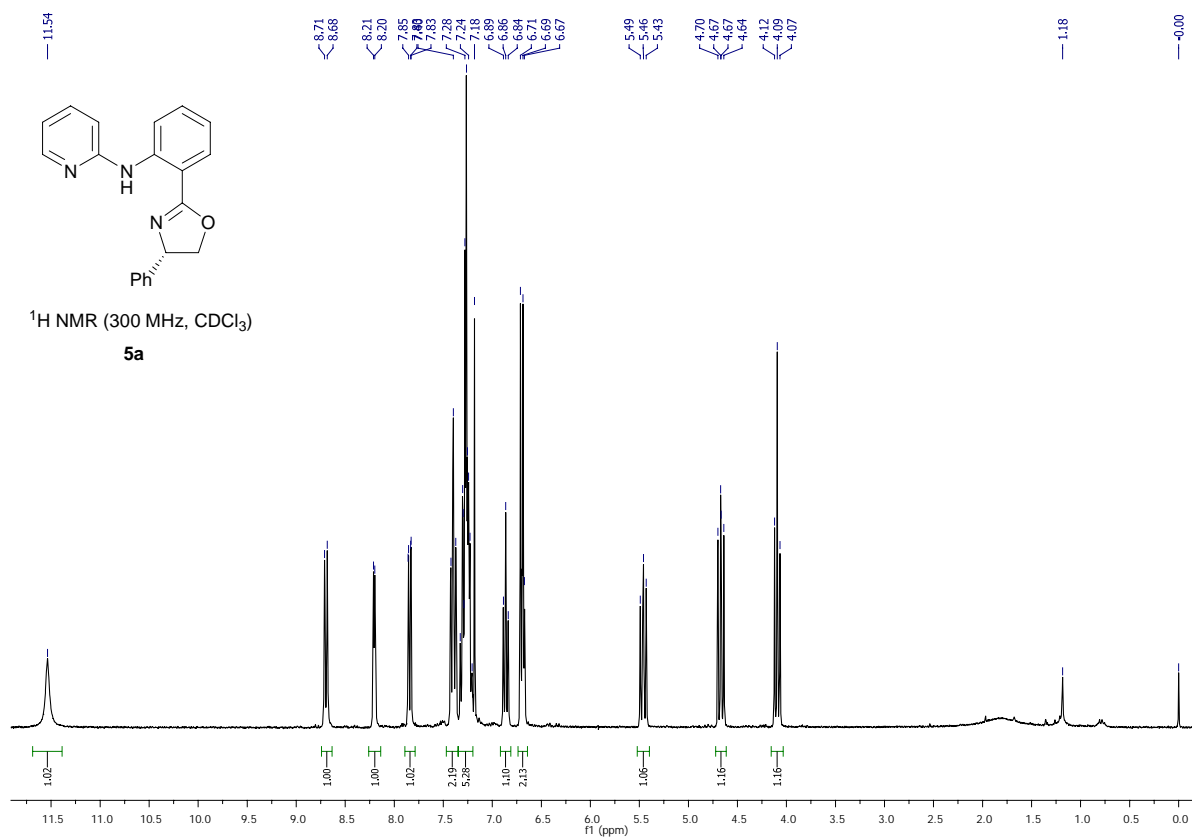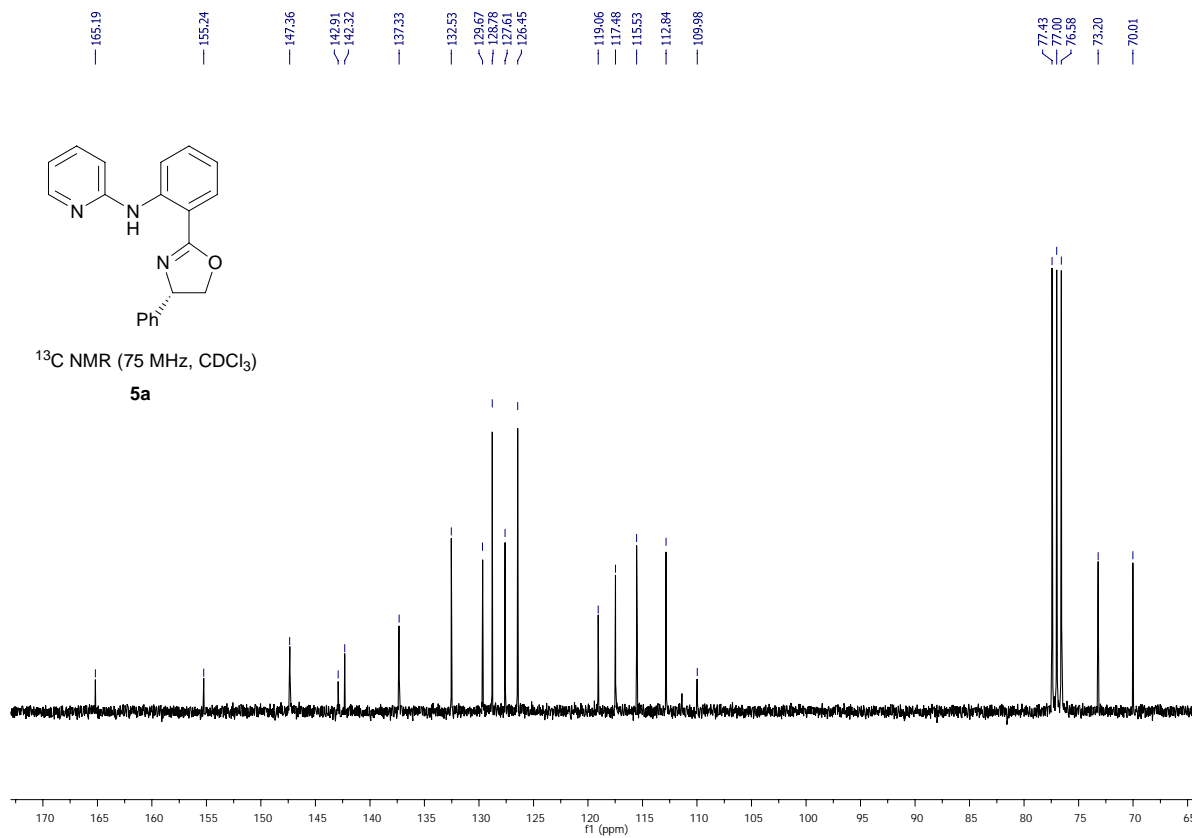



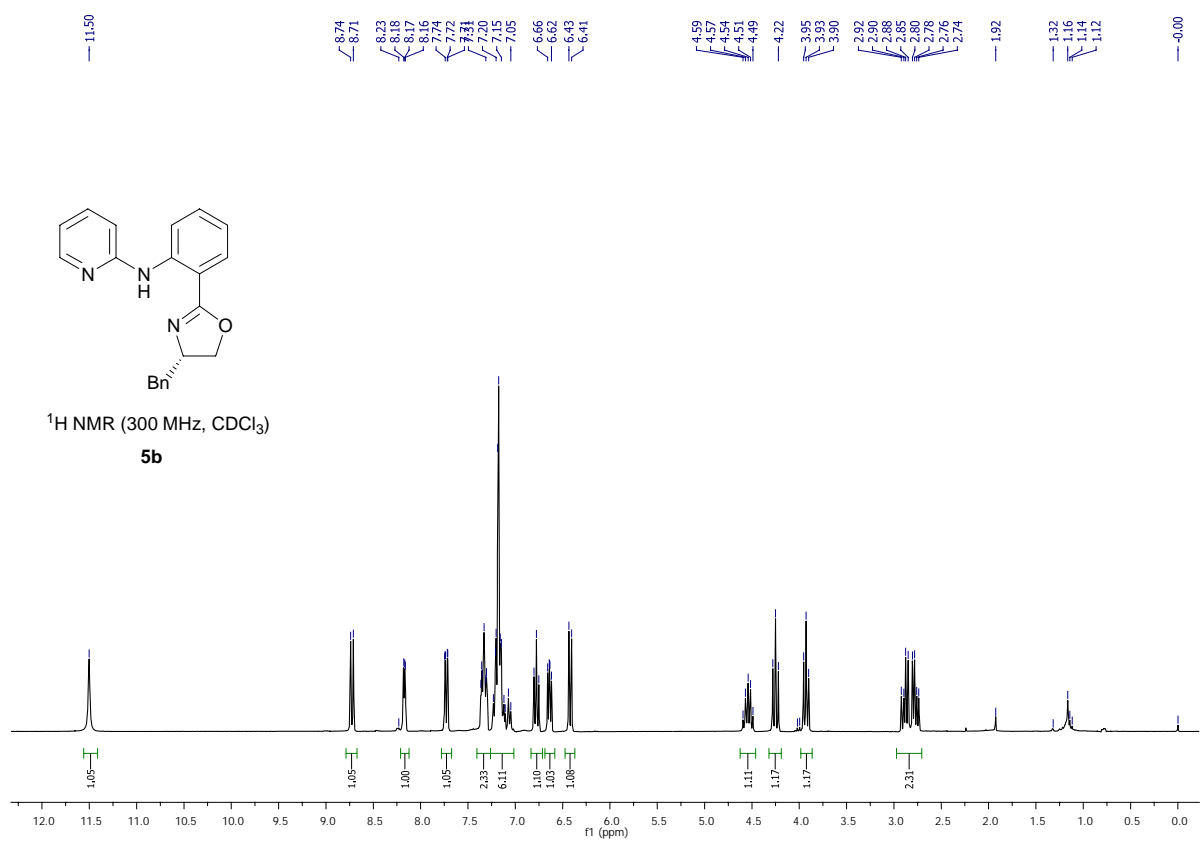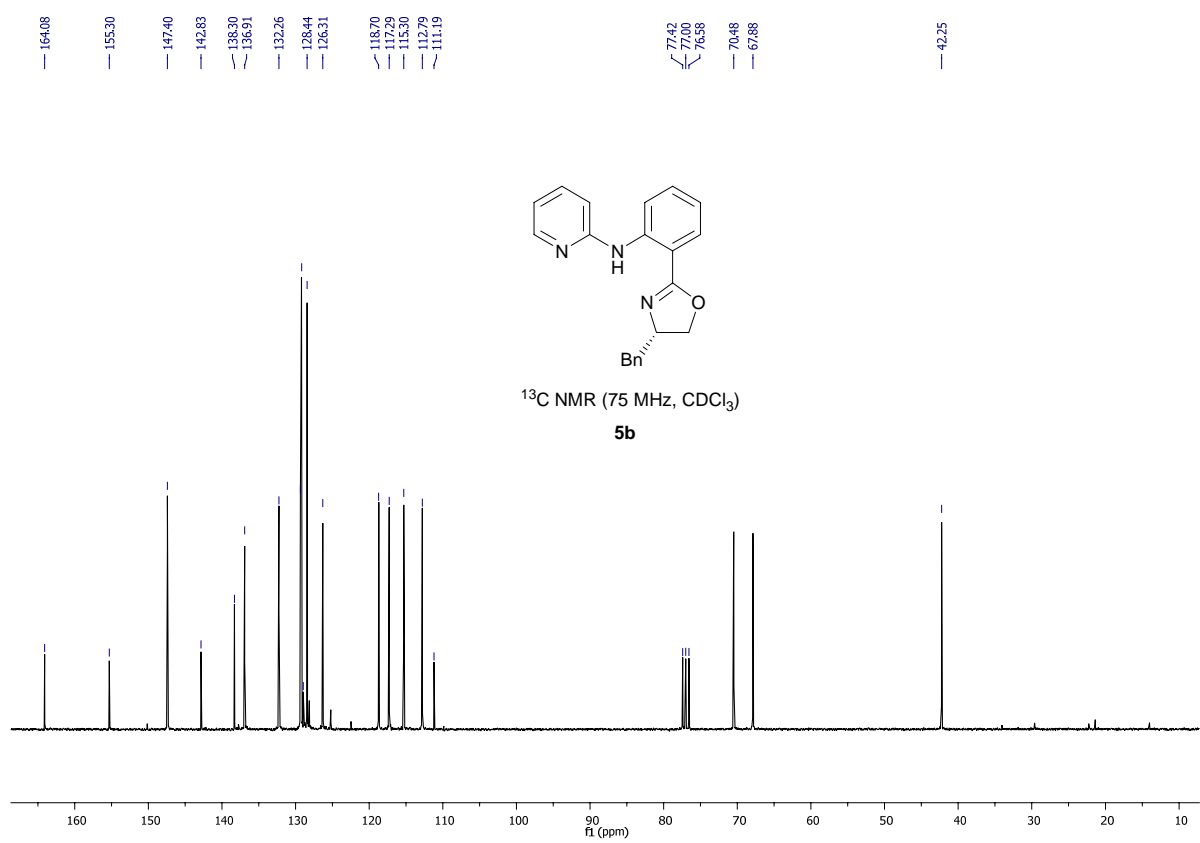

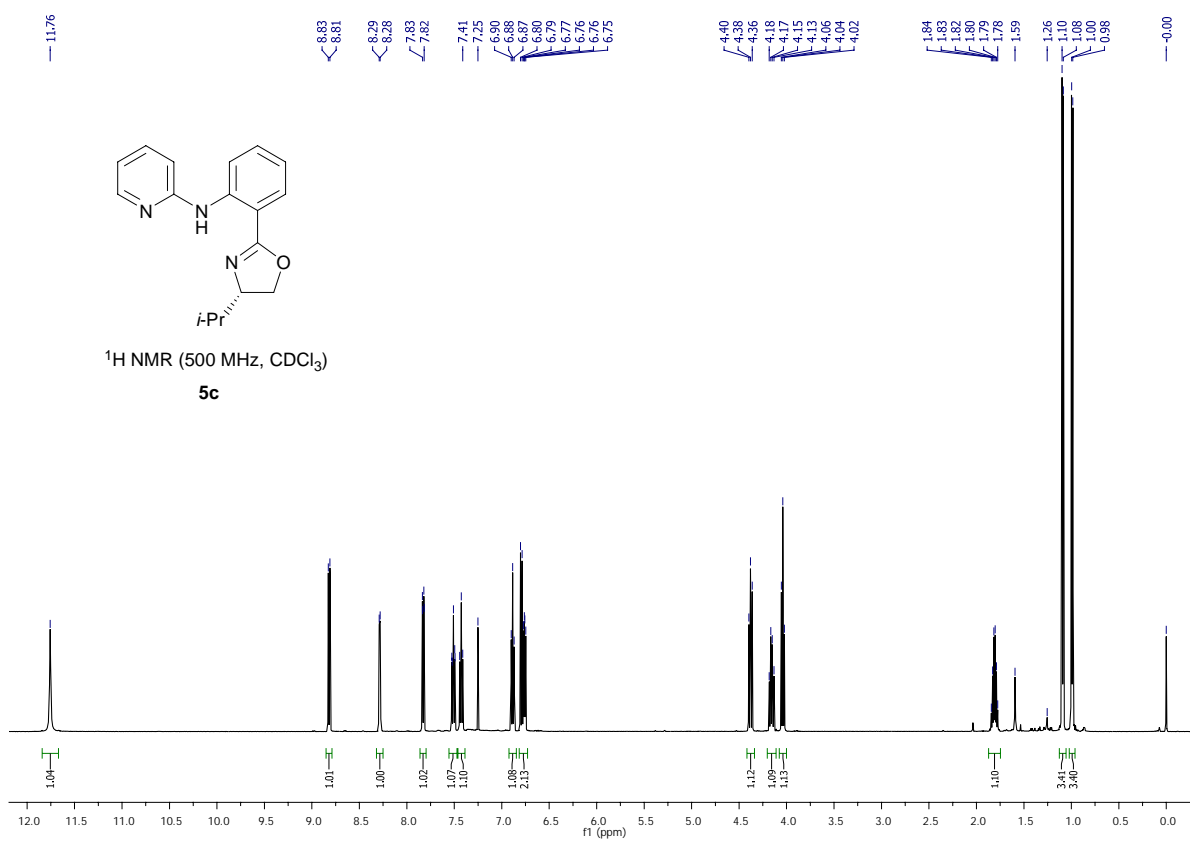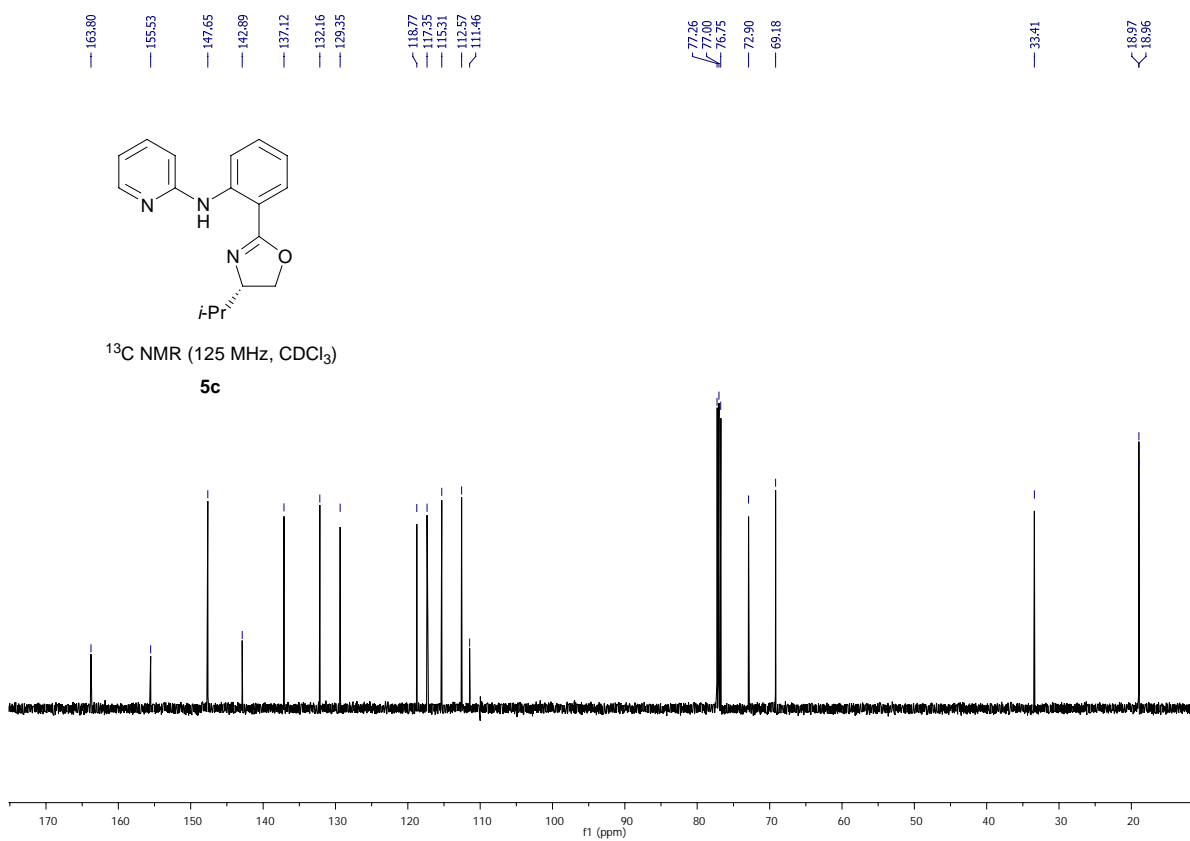





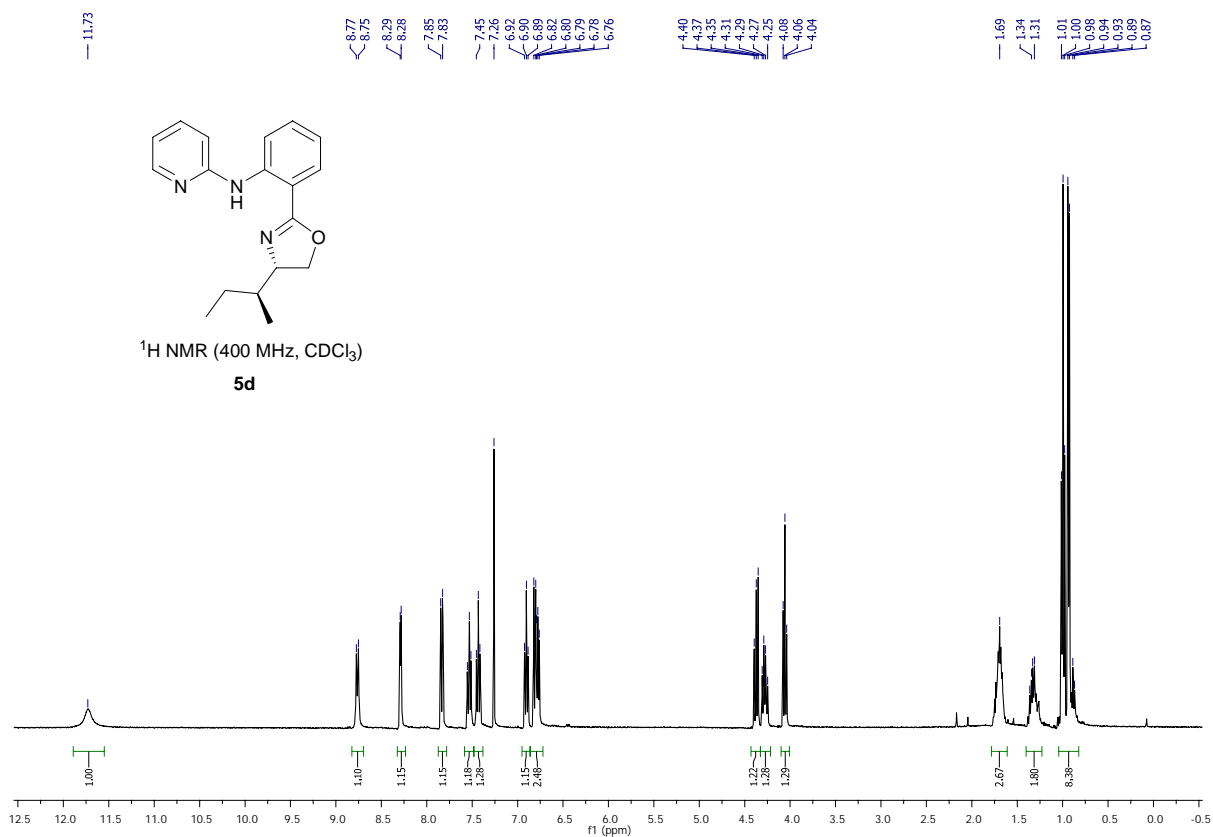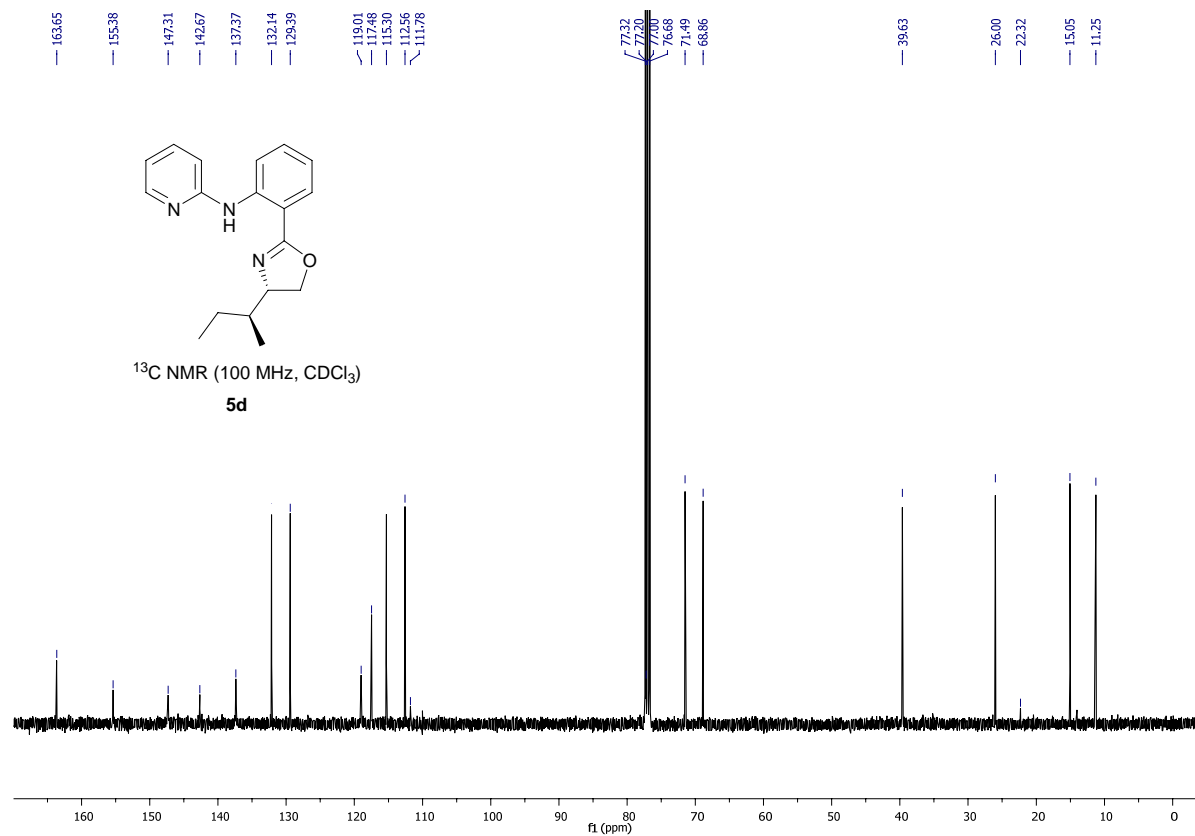

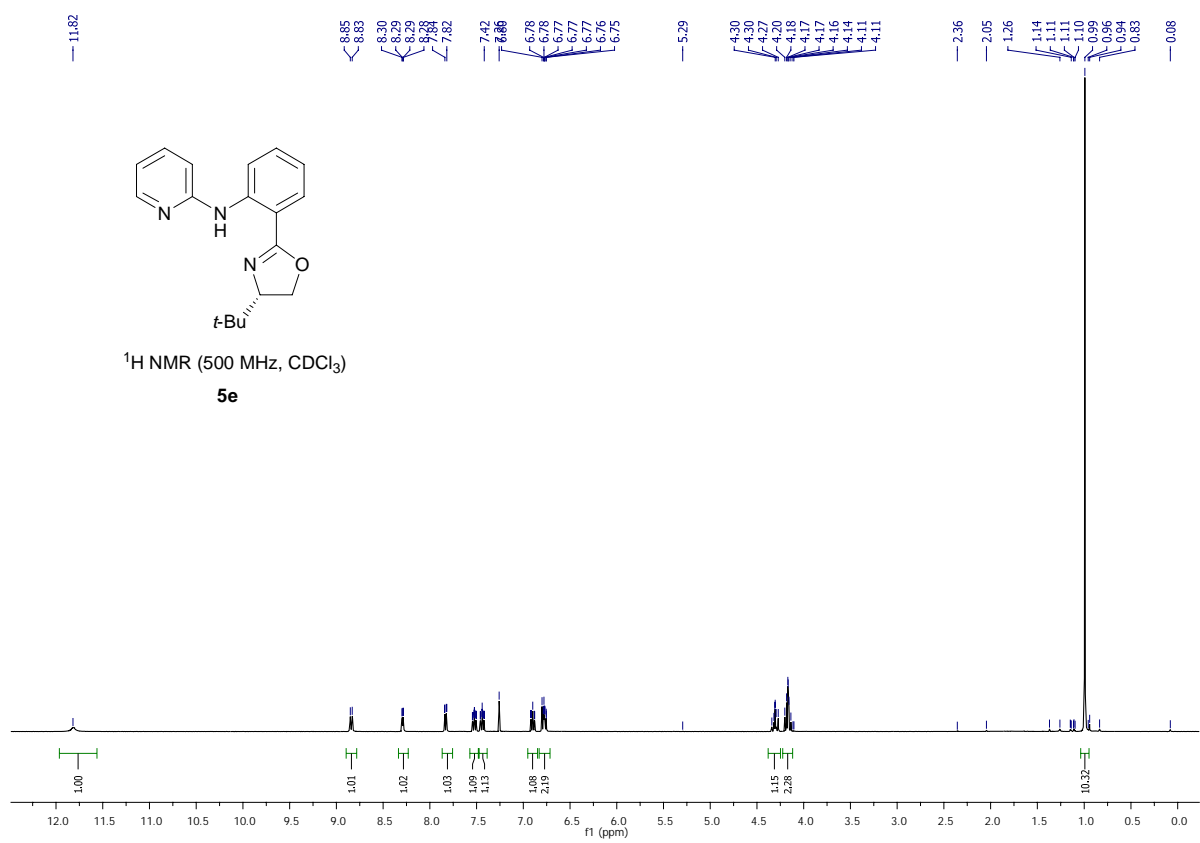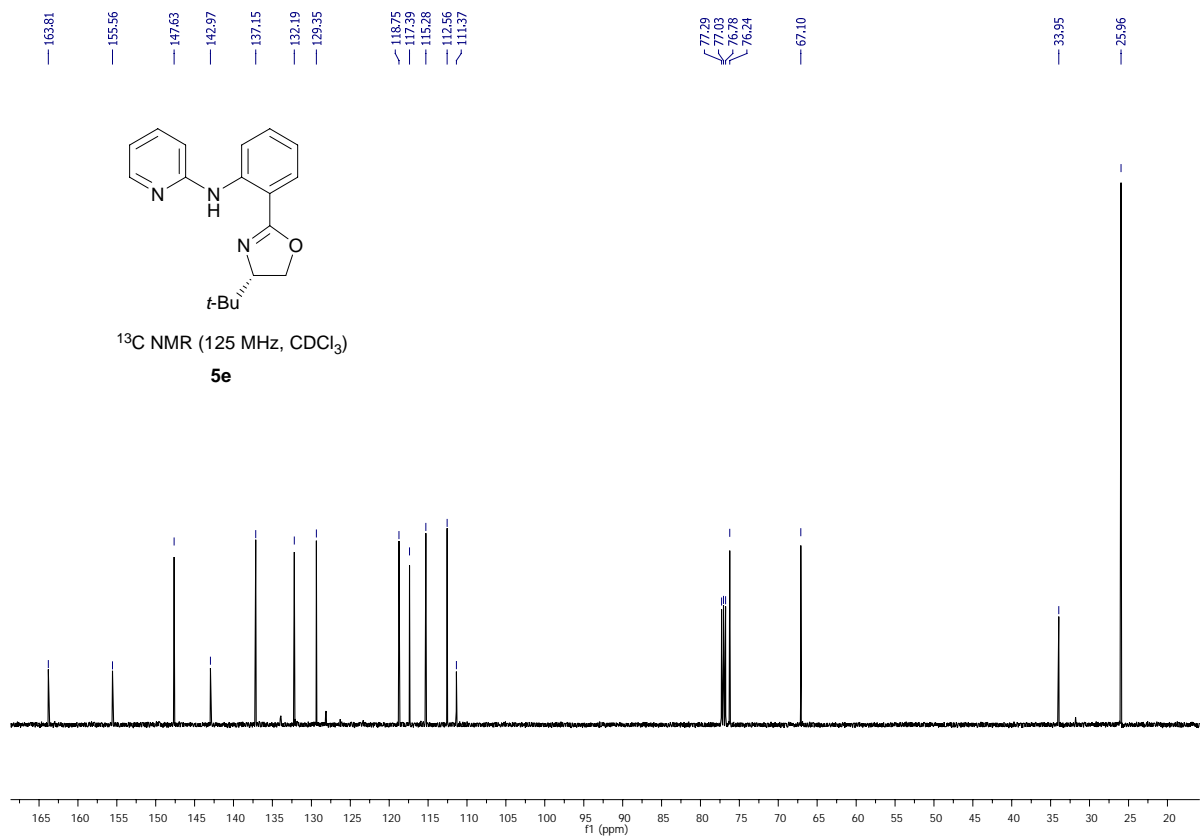



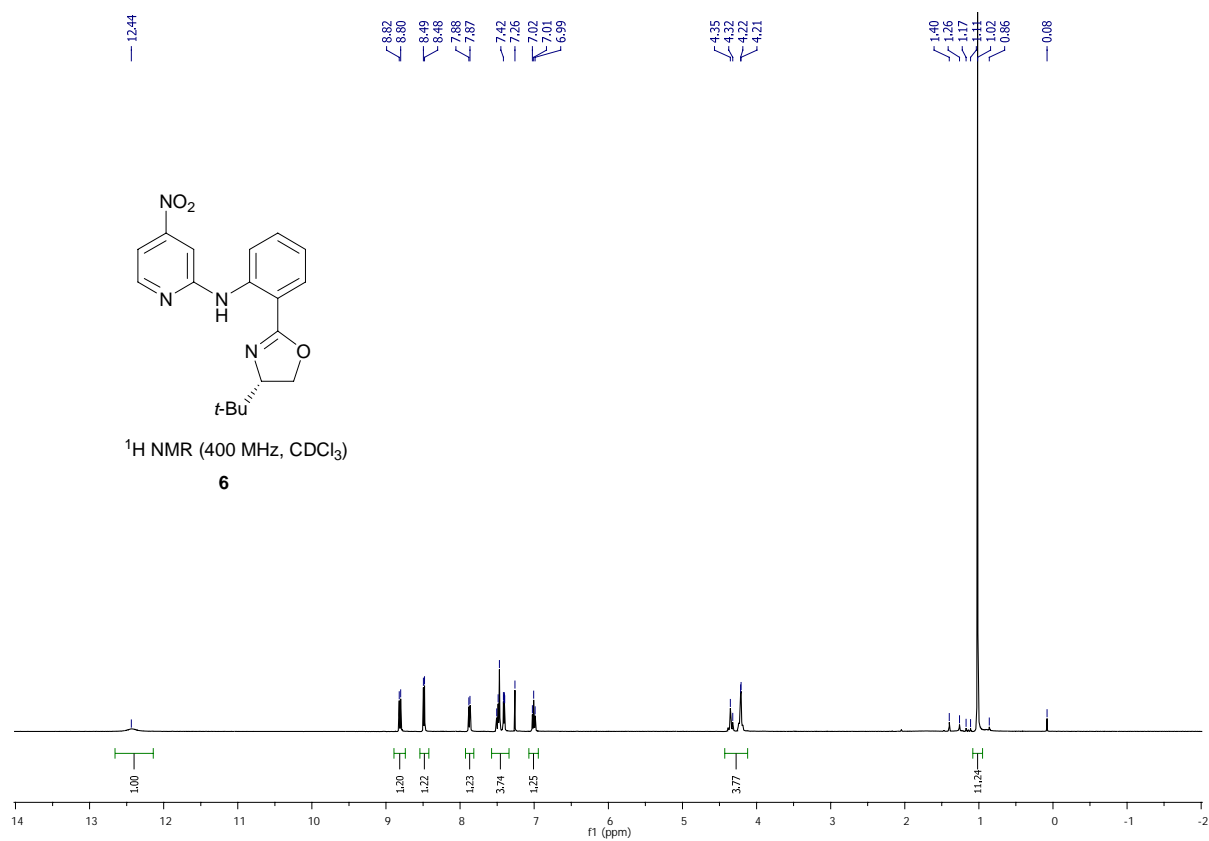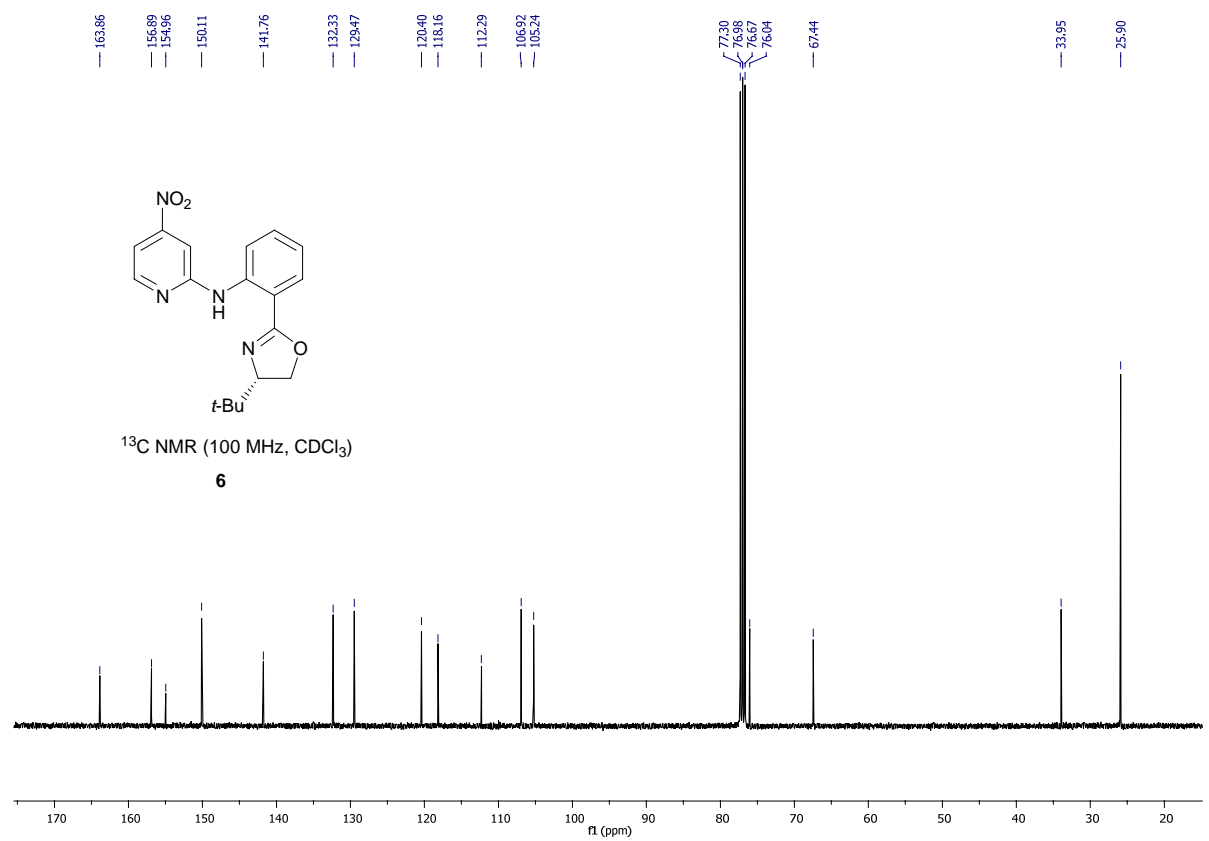



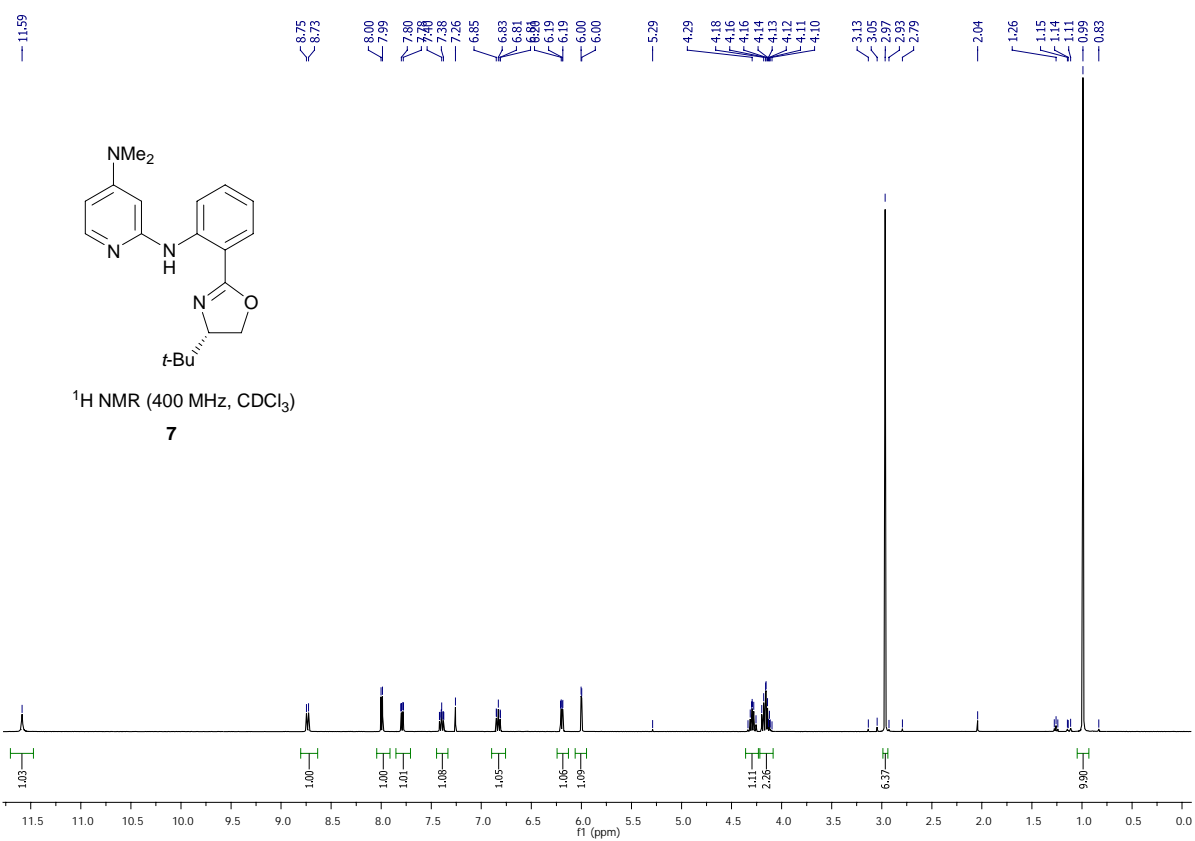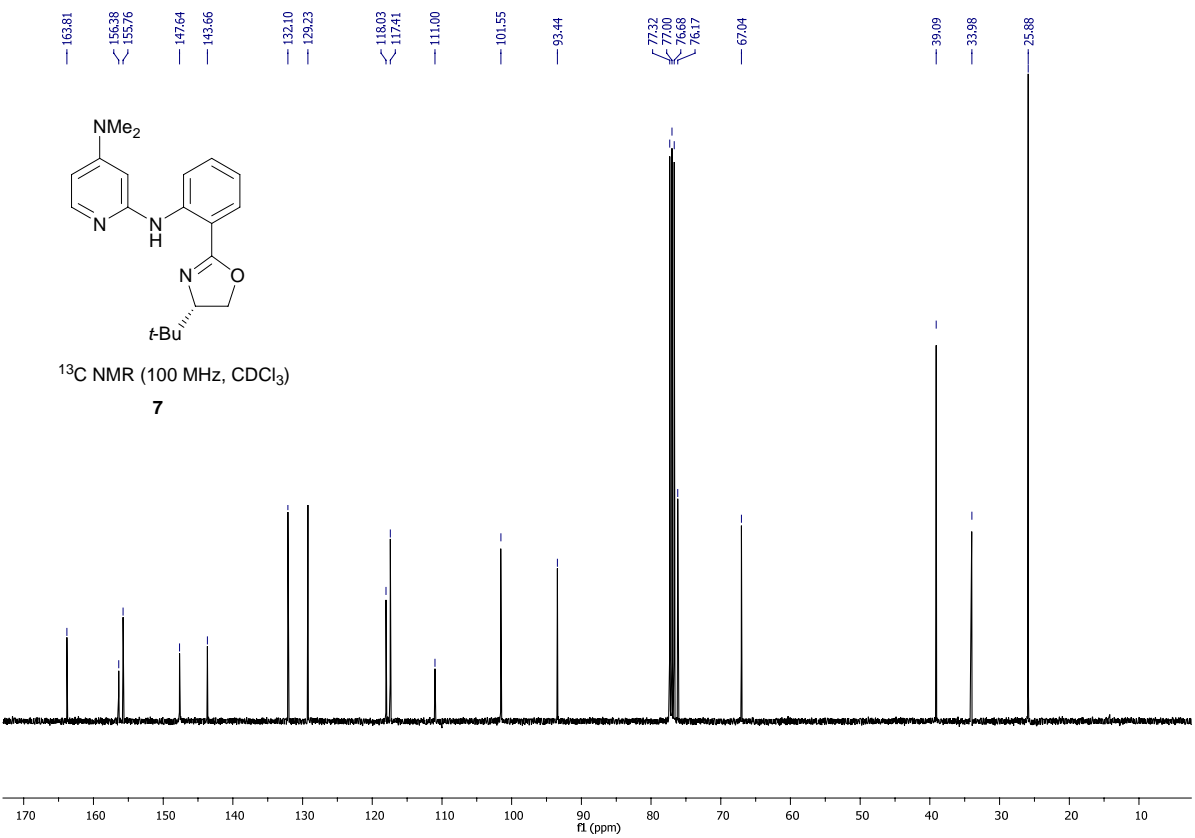



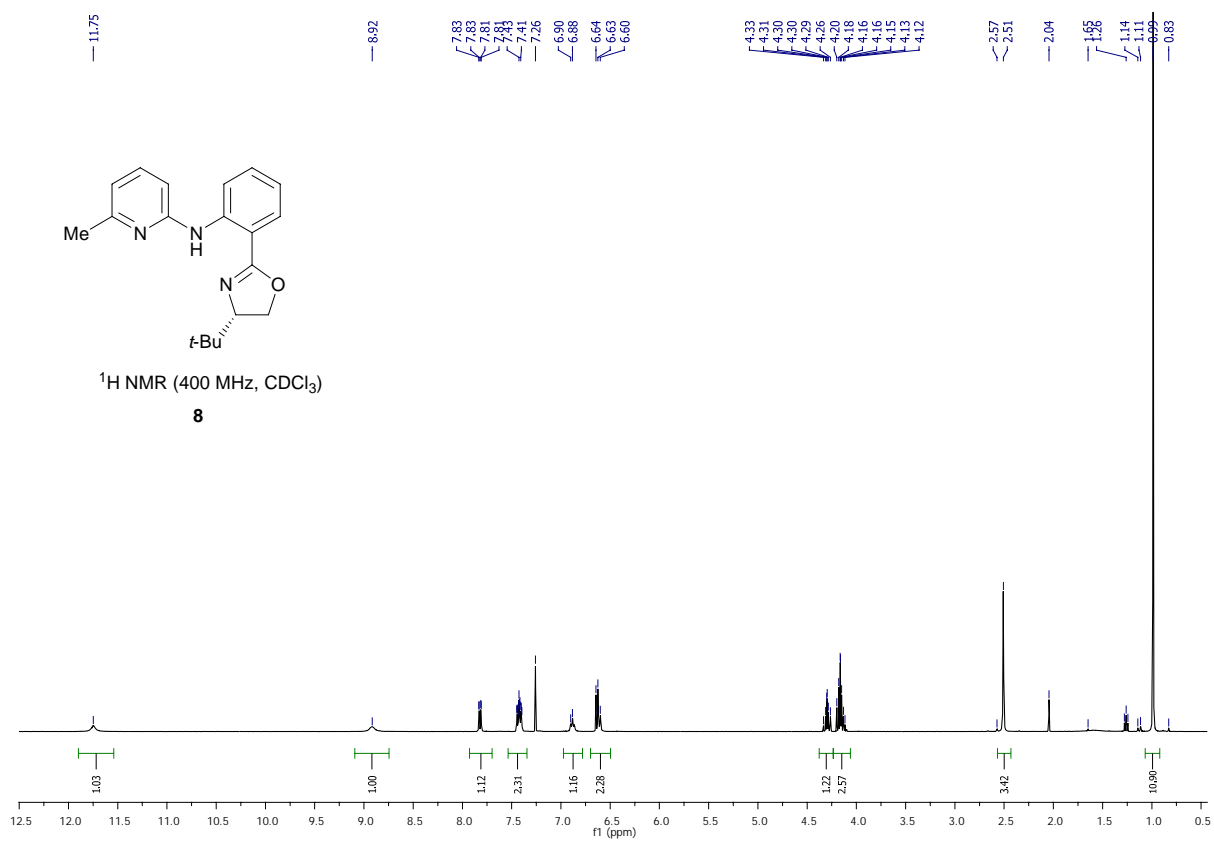



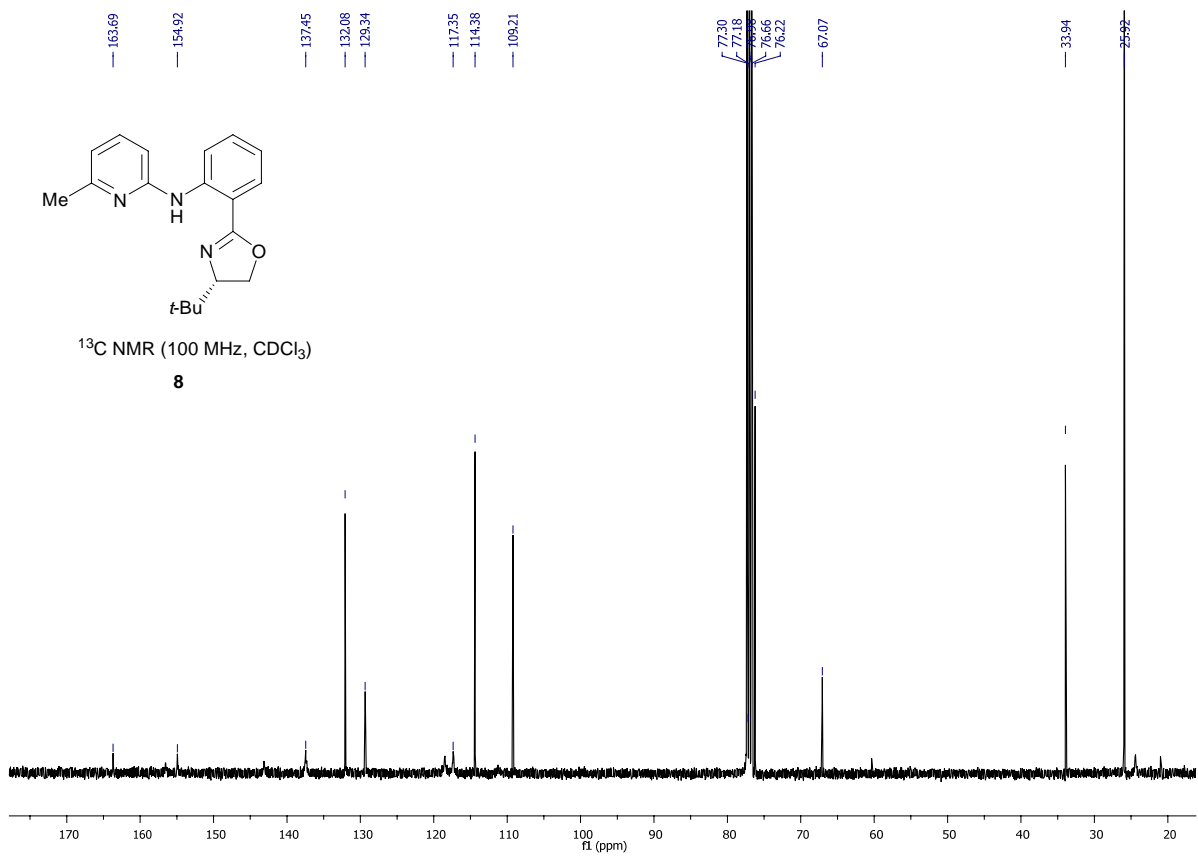

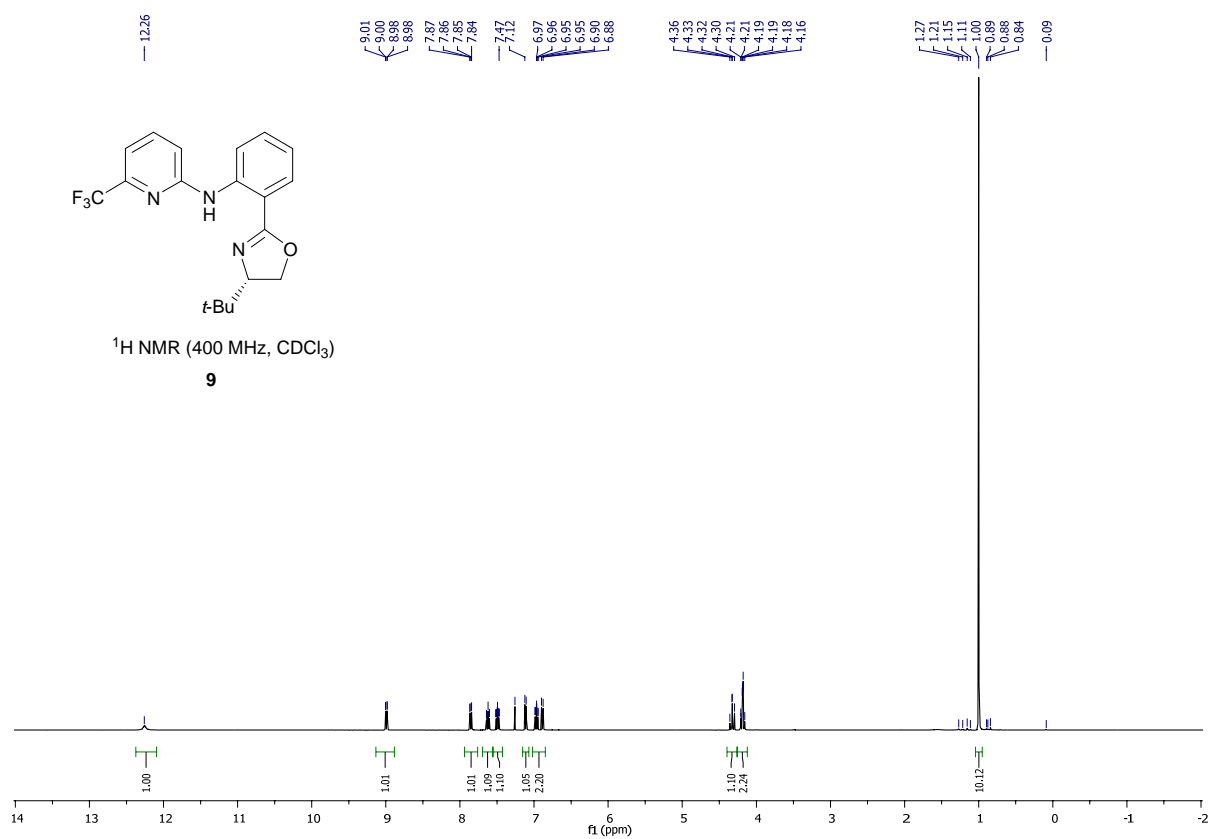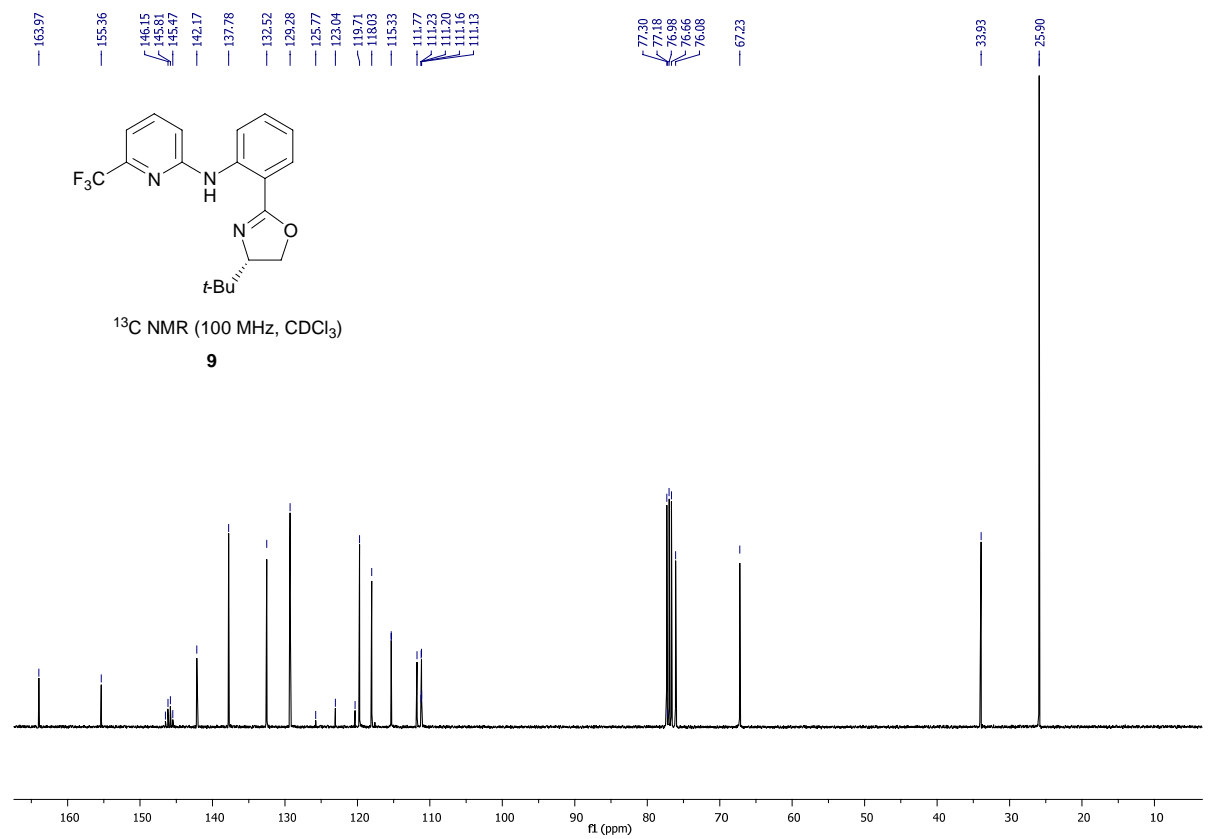

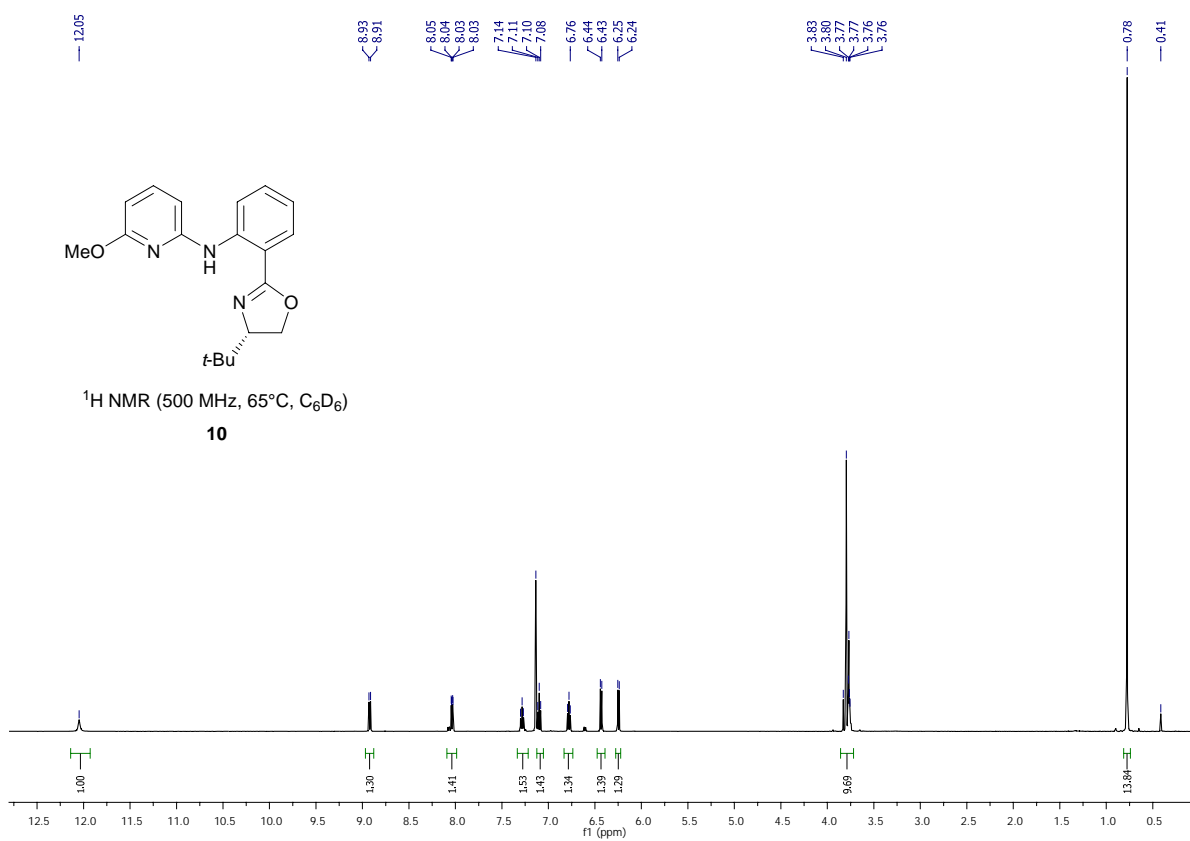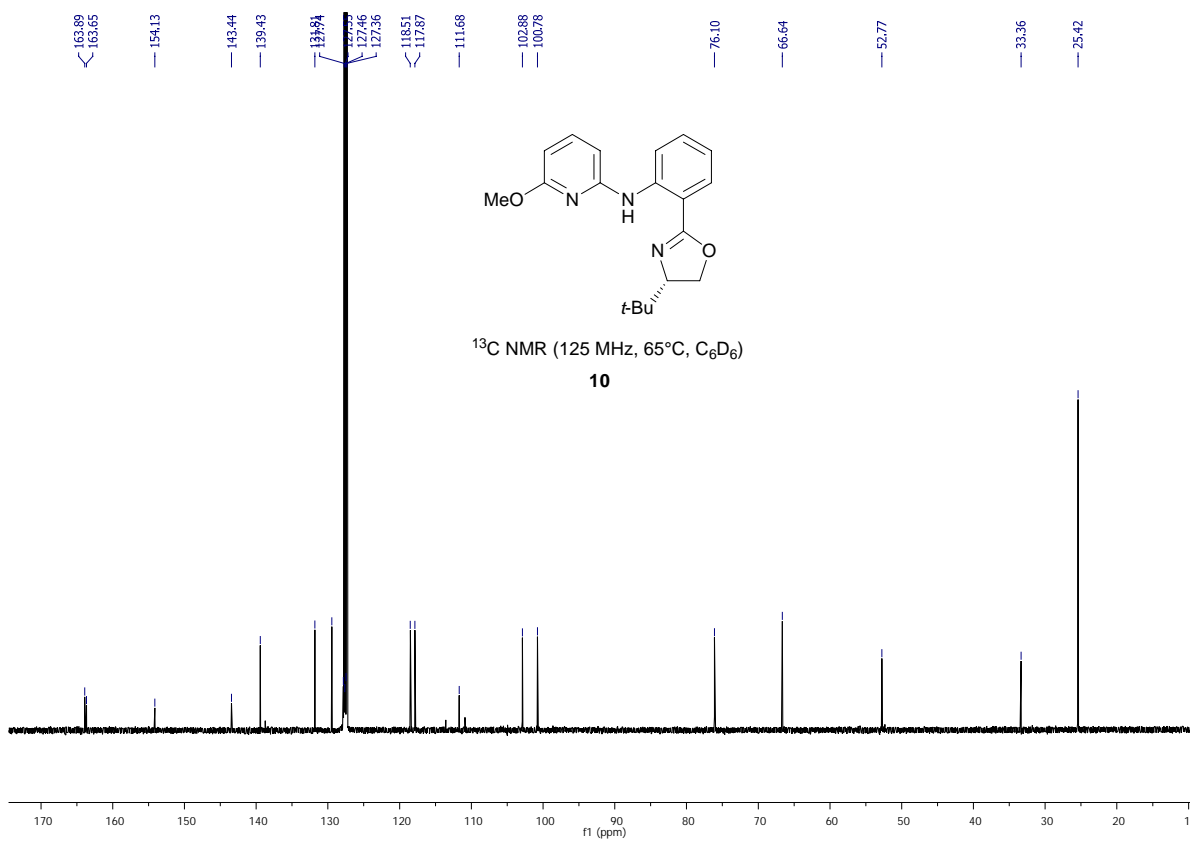

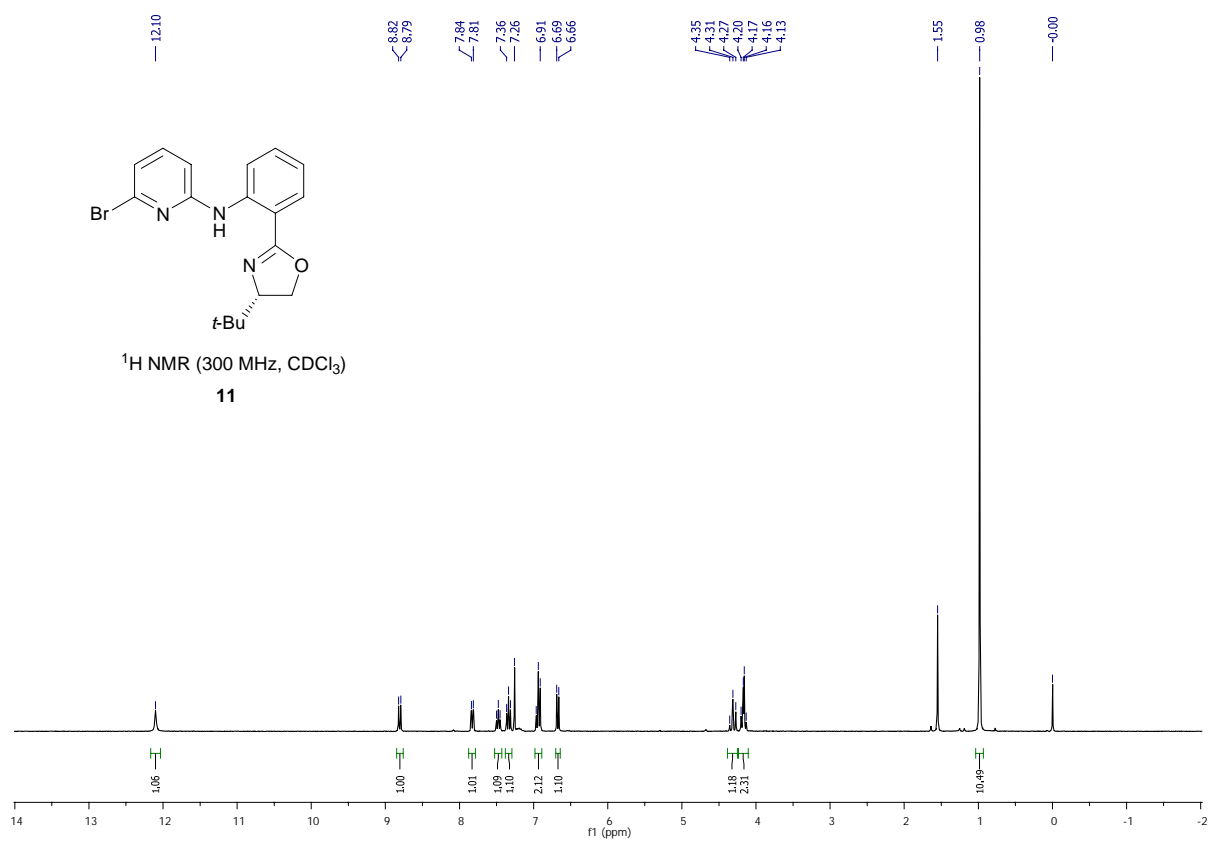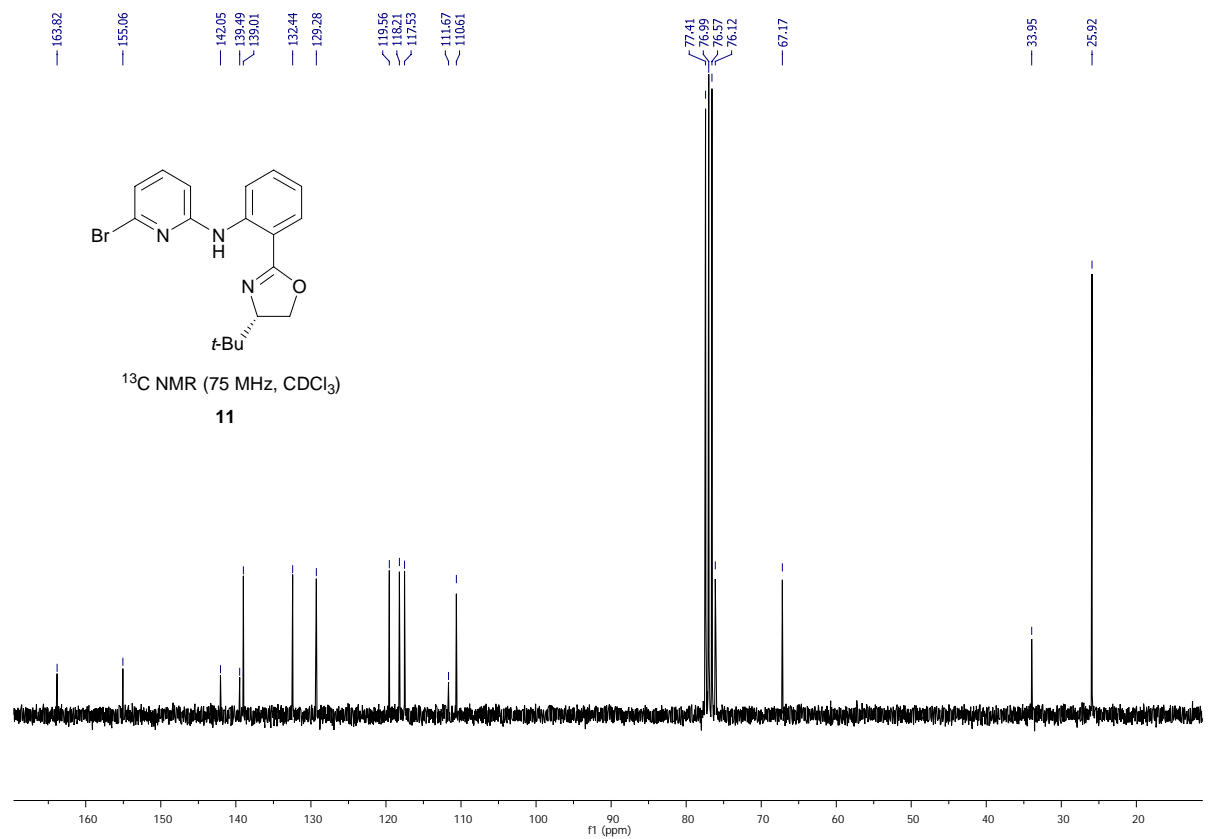

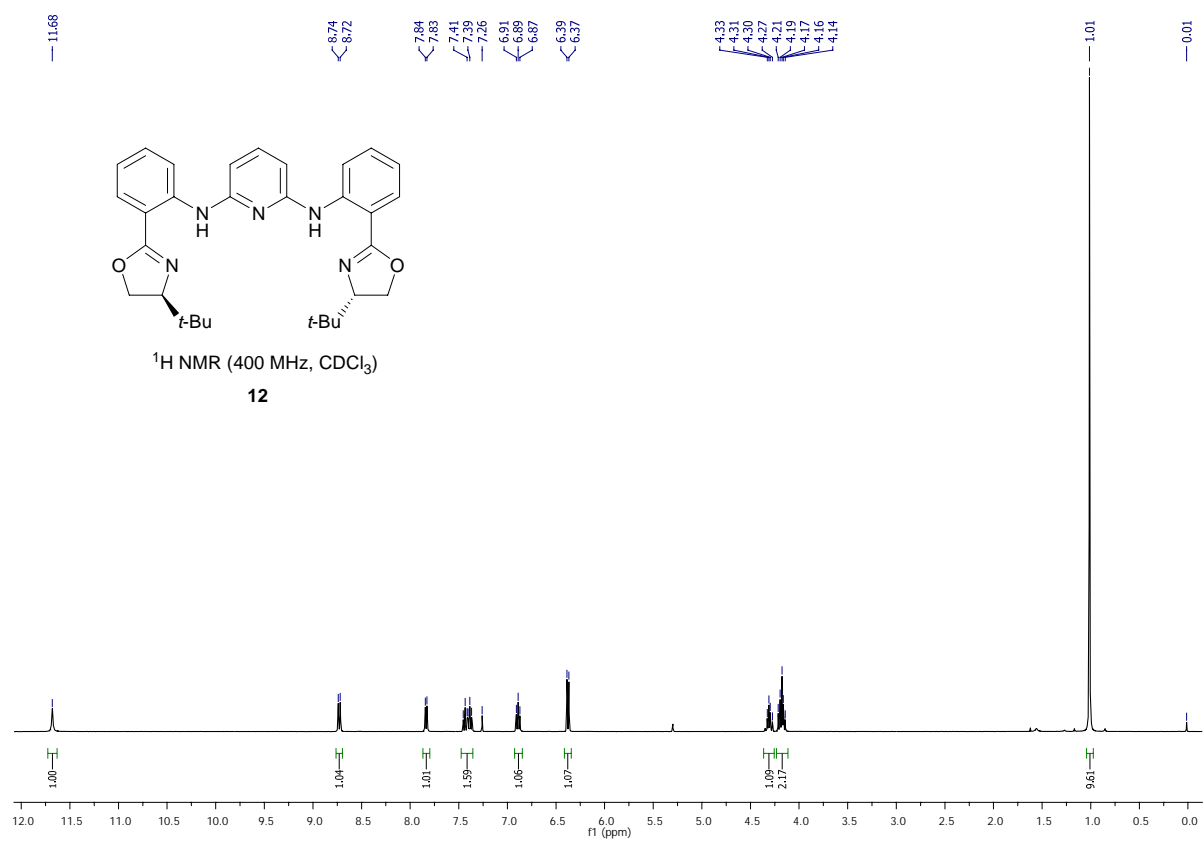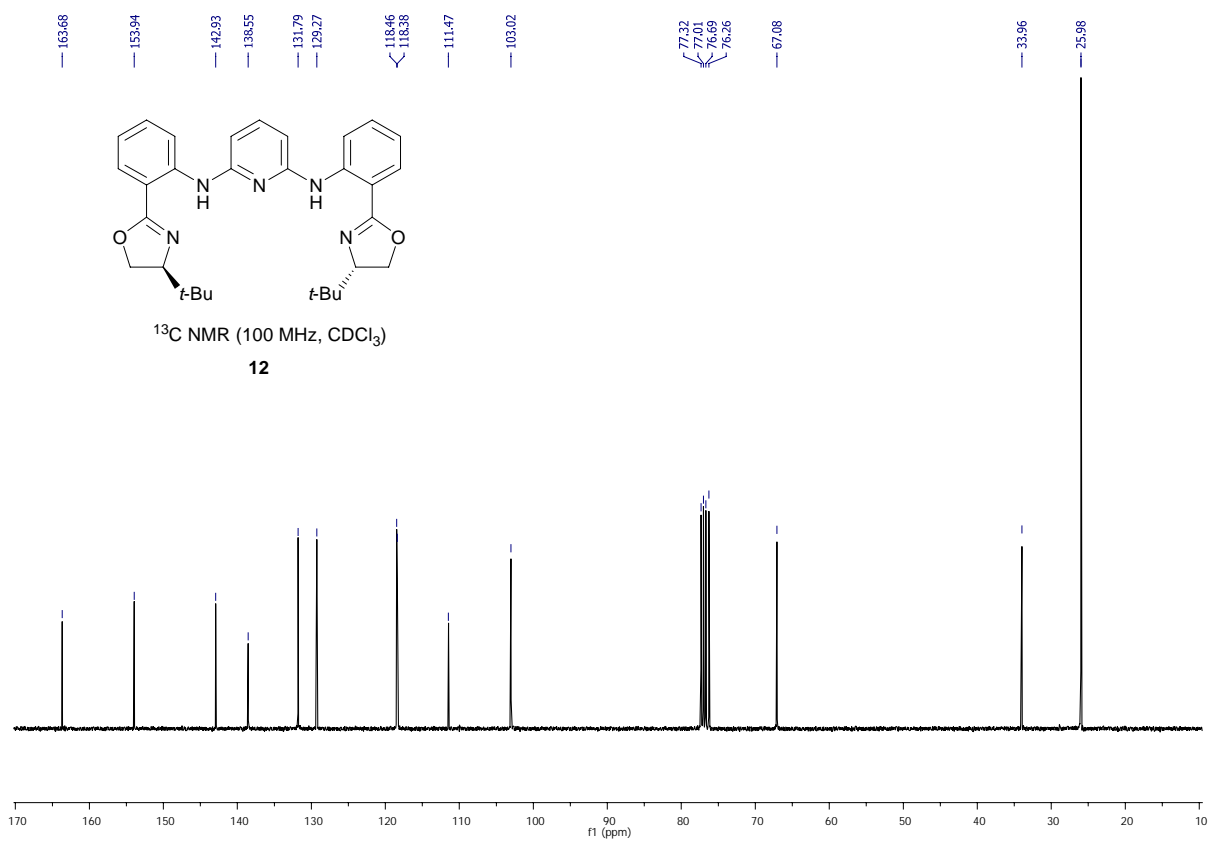



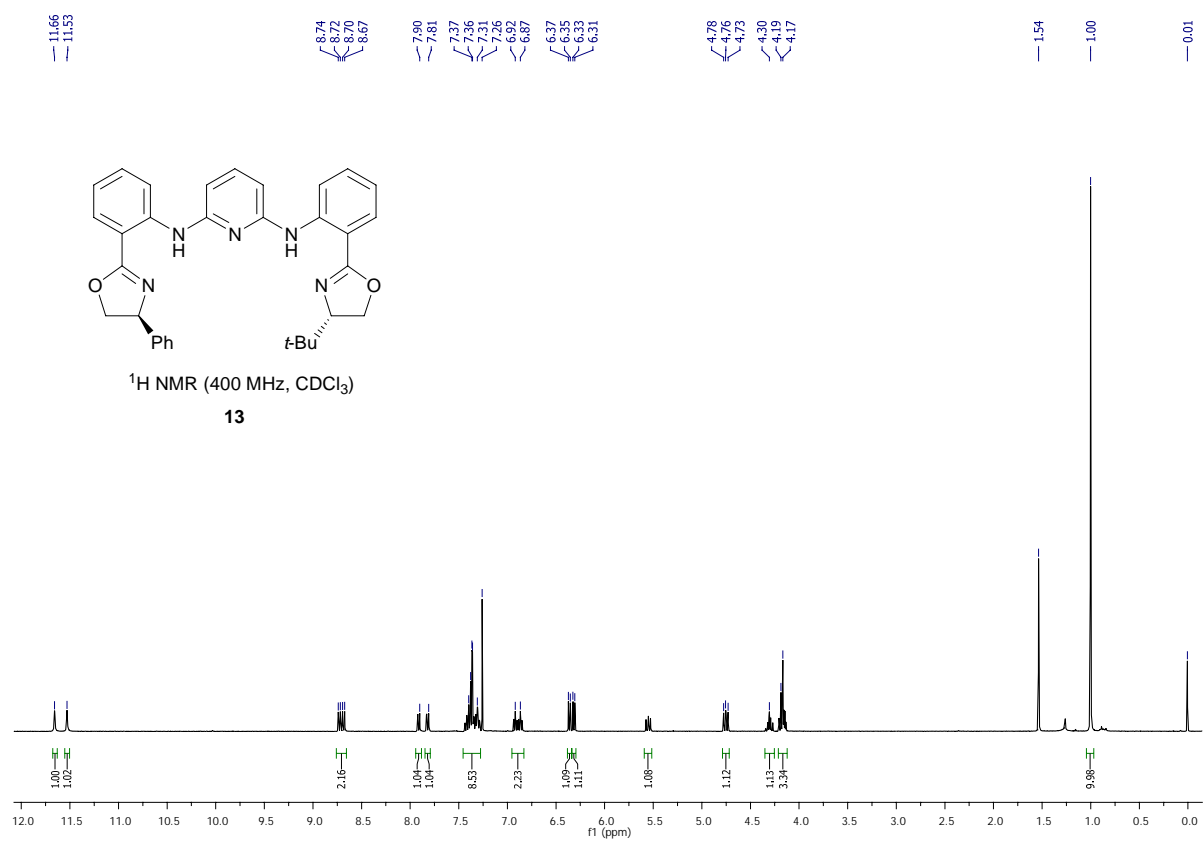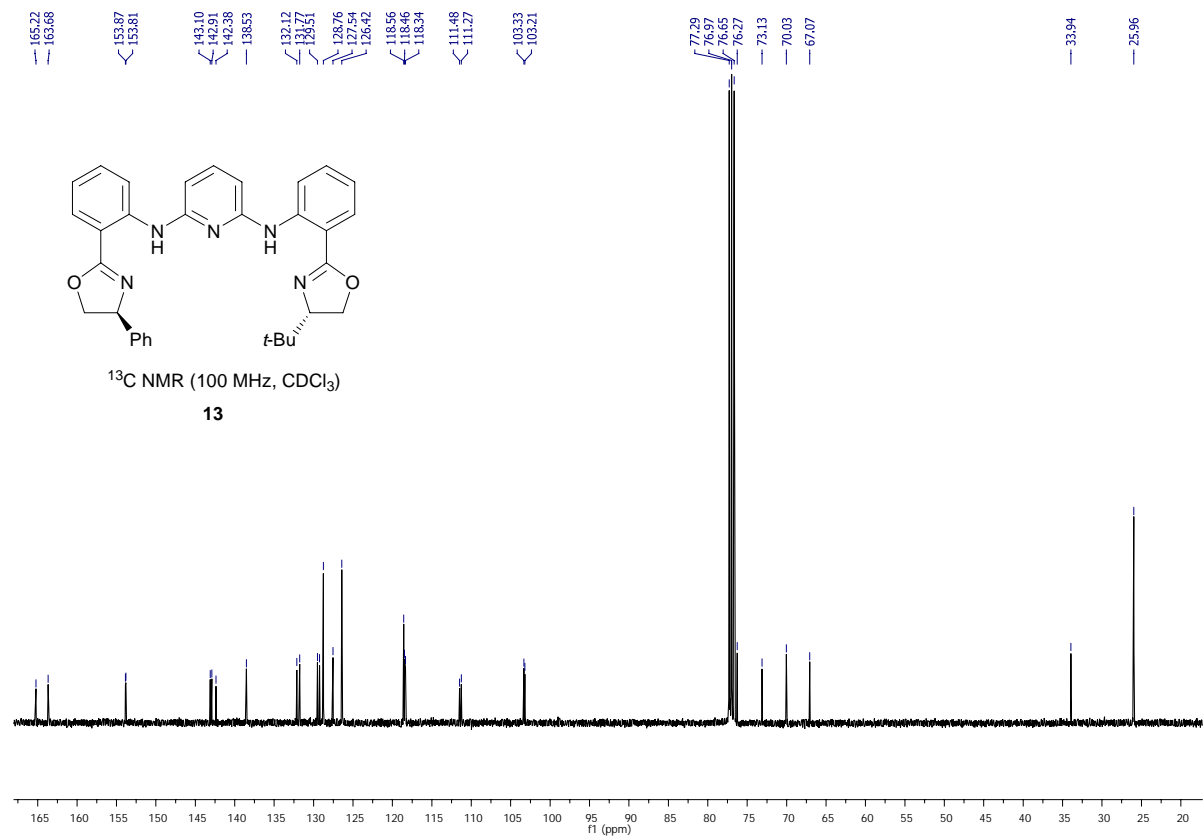





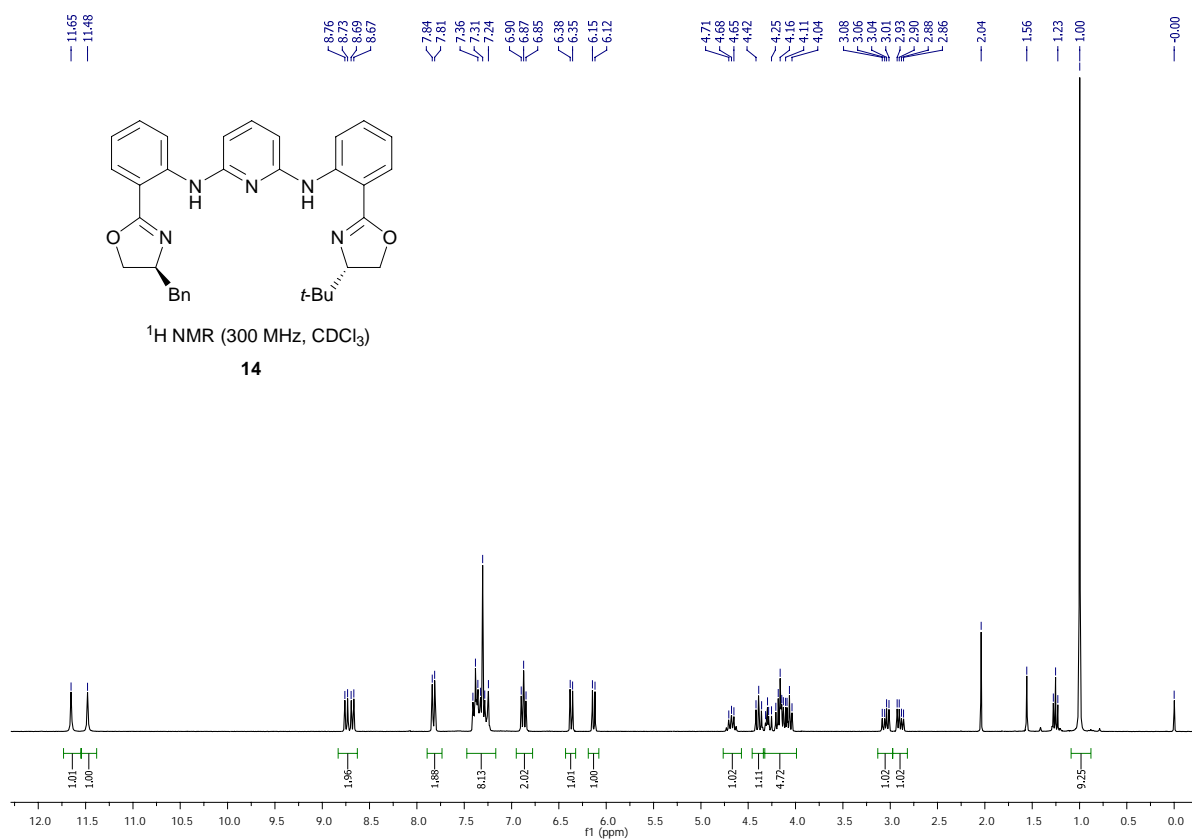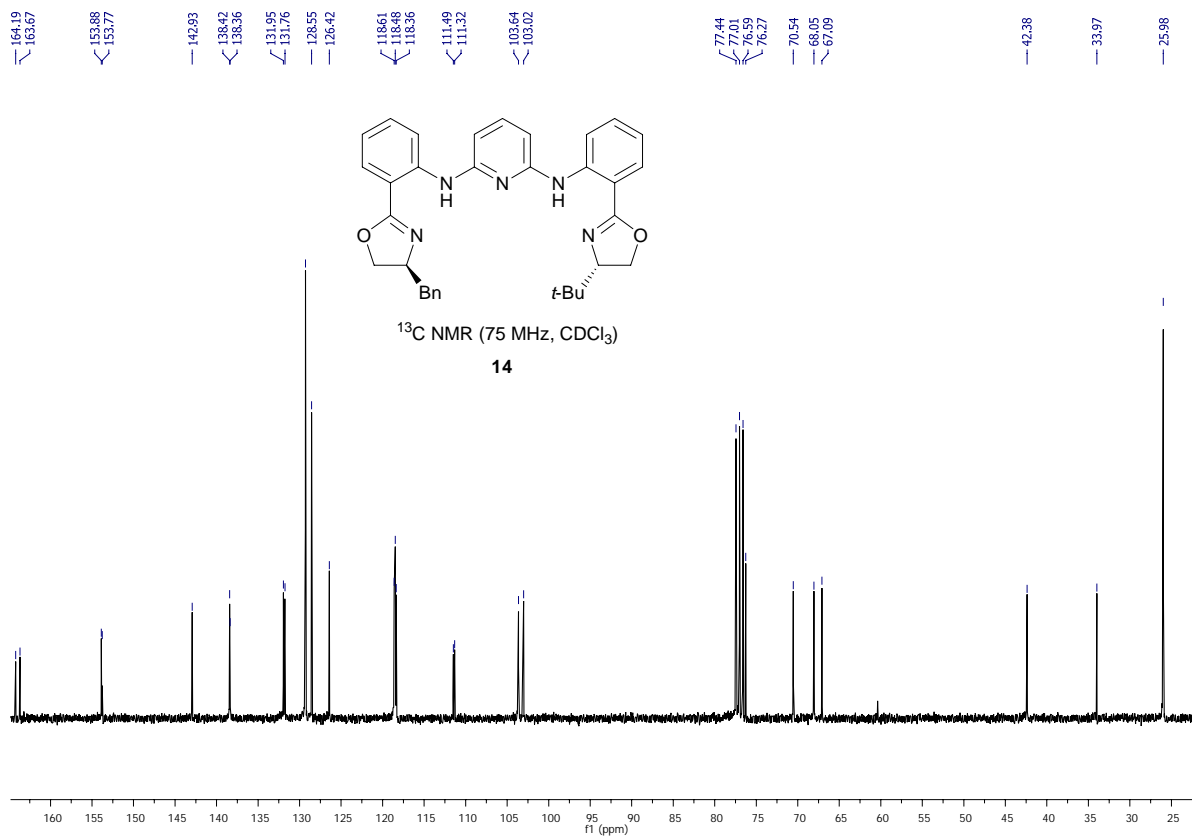



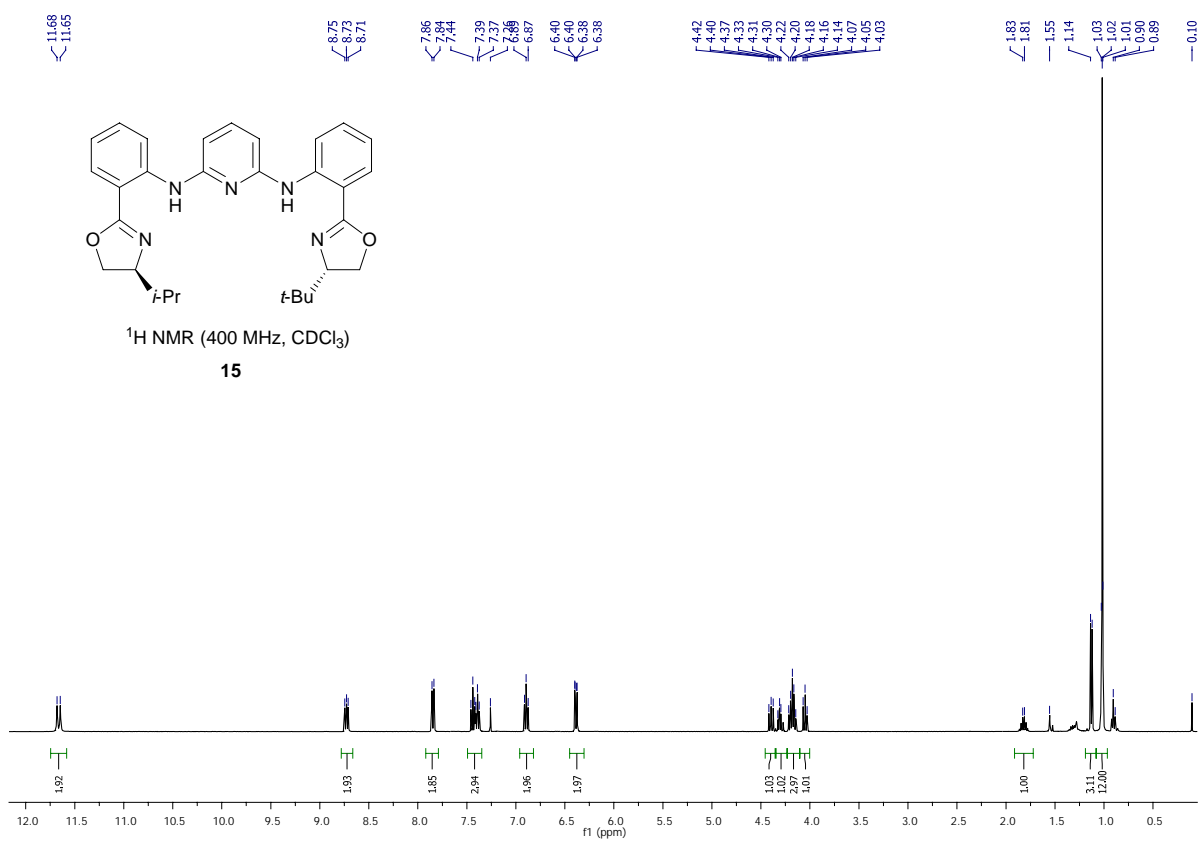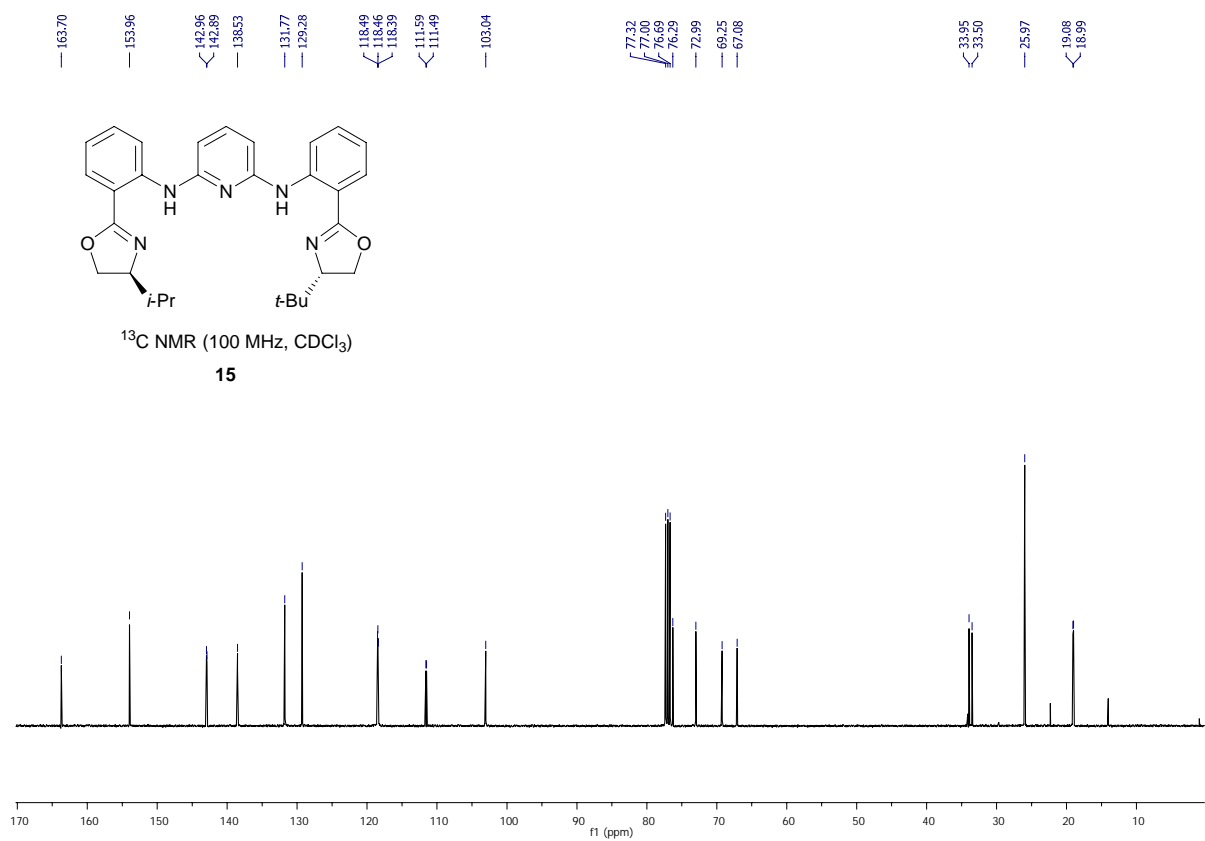



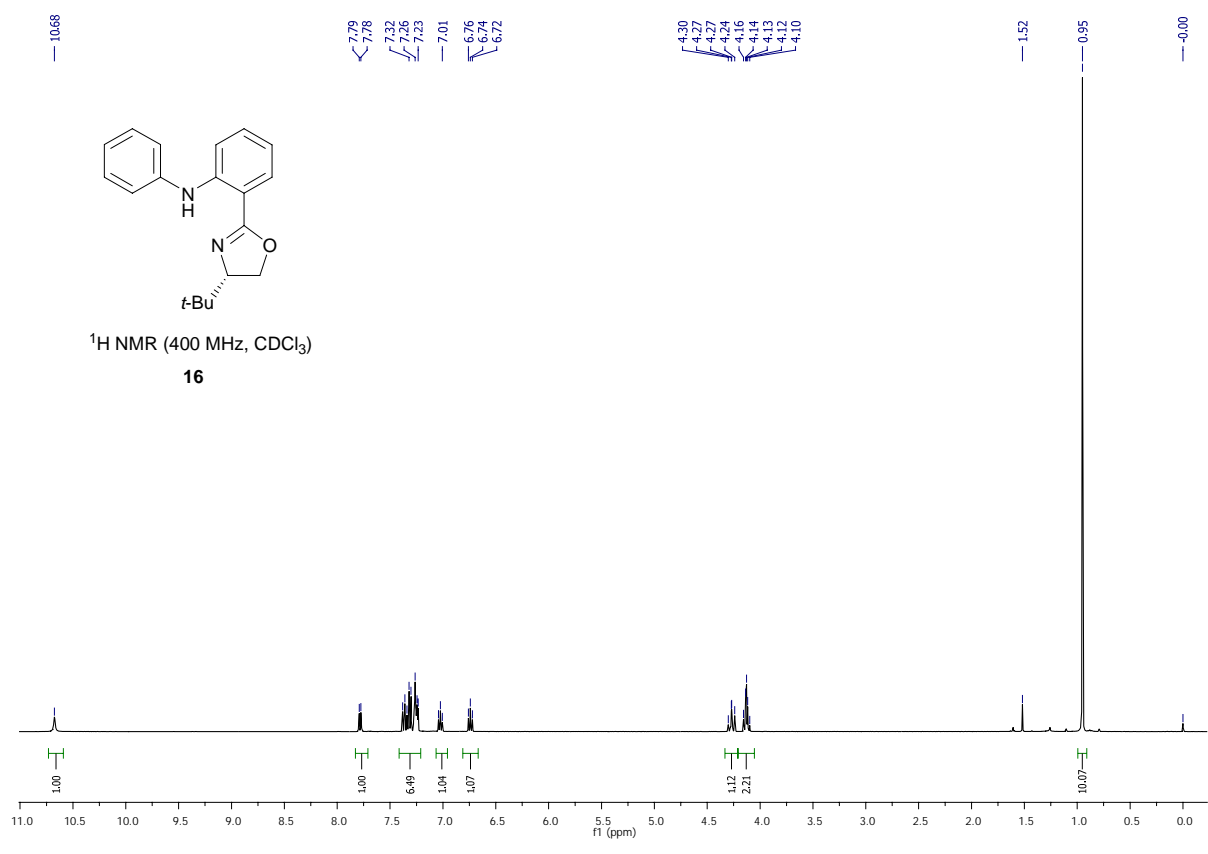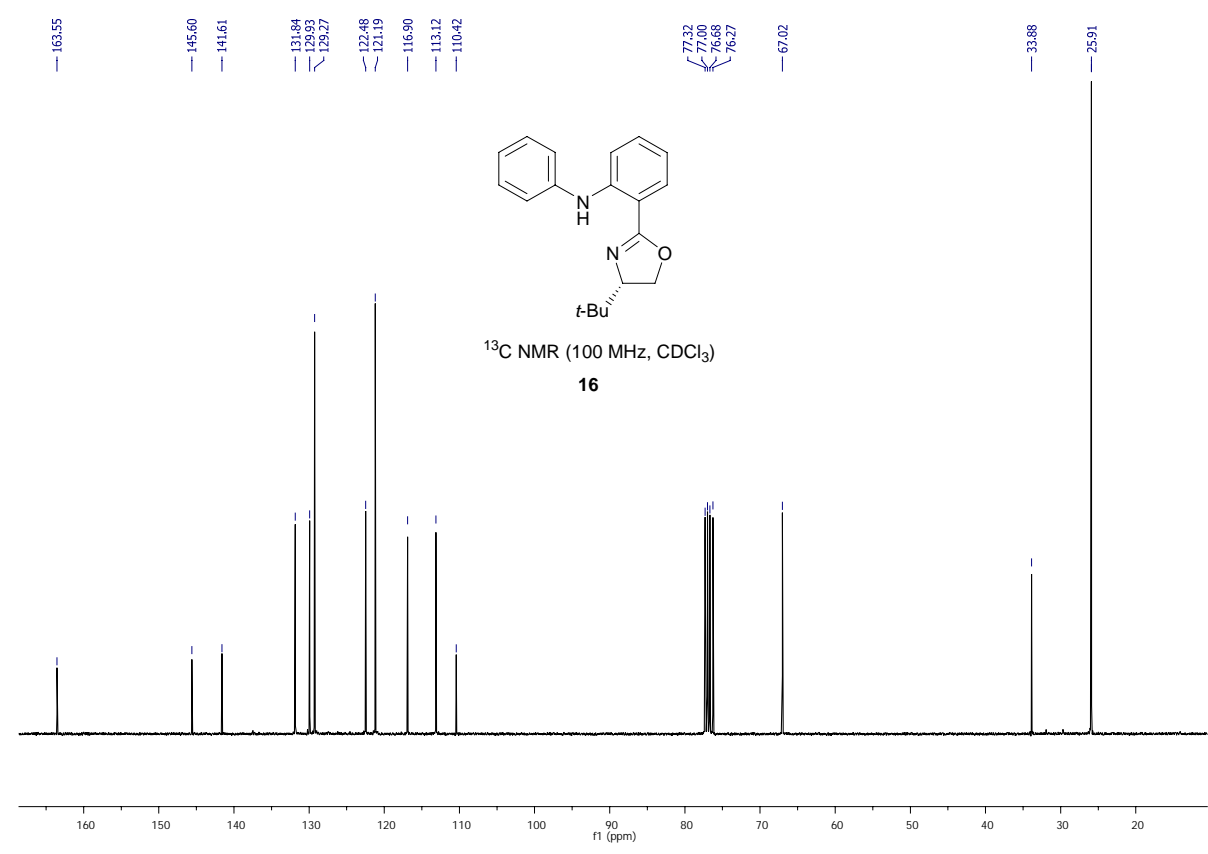



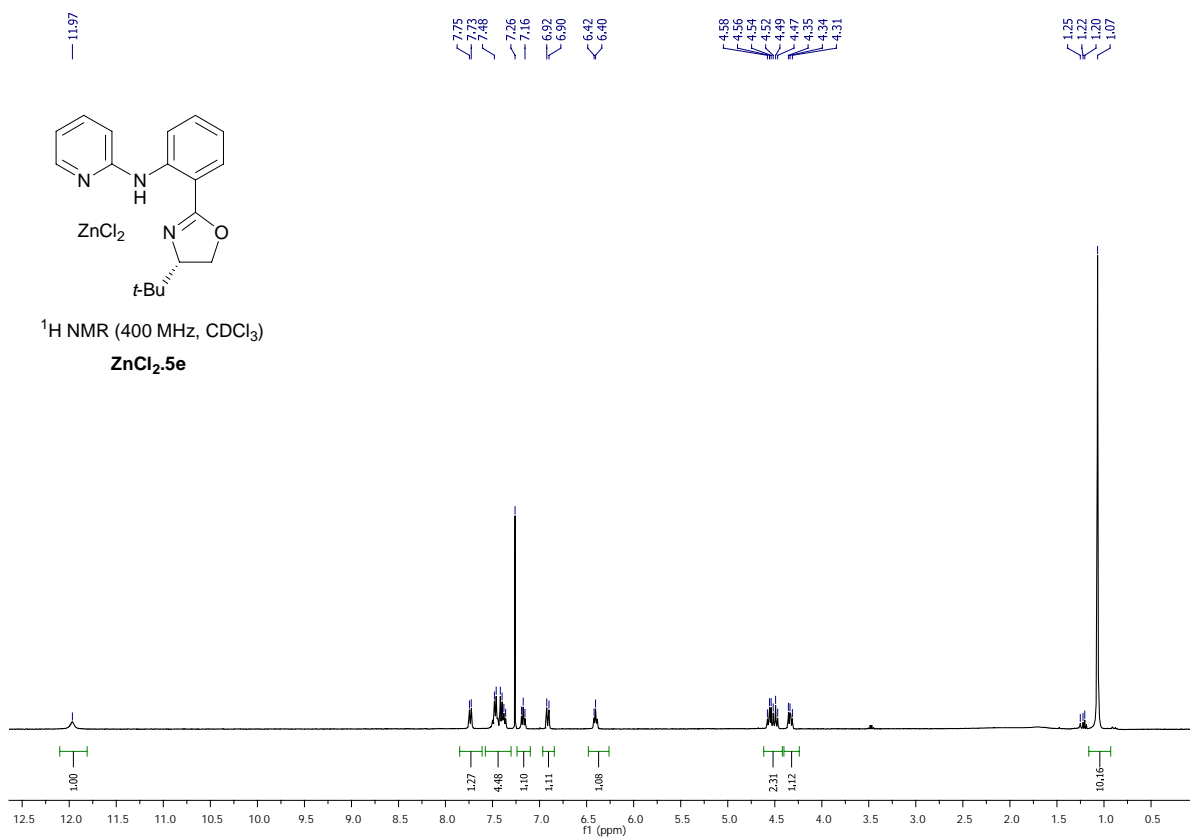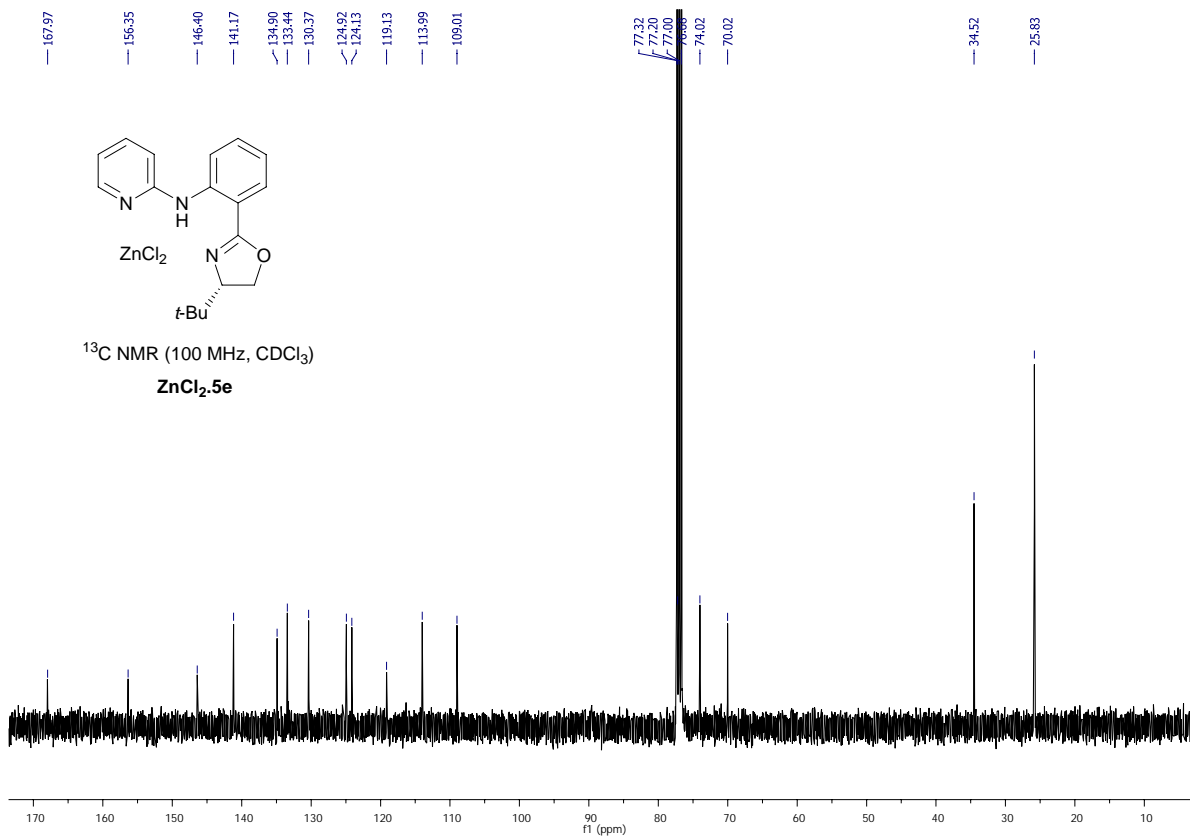

Supplement: b822580j.pdf [file b822580j.pdf]
